# Supplementary material for: Induced pluripotent stem cell models of Zellweger spectrum disorder show impaired peroxisome assembly and cell type-specific lipid abnormalities
Source: PubMed Central journal article supplement (PMC4553005; doi:10.1186/s13287-015-0149-3), 2015-08-29
Supplement: 13287_2015_149_MOESM5_ESM.pdf [file 13287_2015_149_MOESM5_ESM.pdf]

# Control1 iPS1

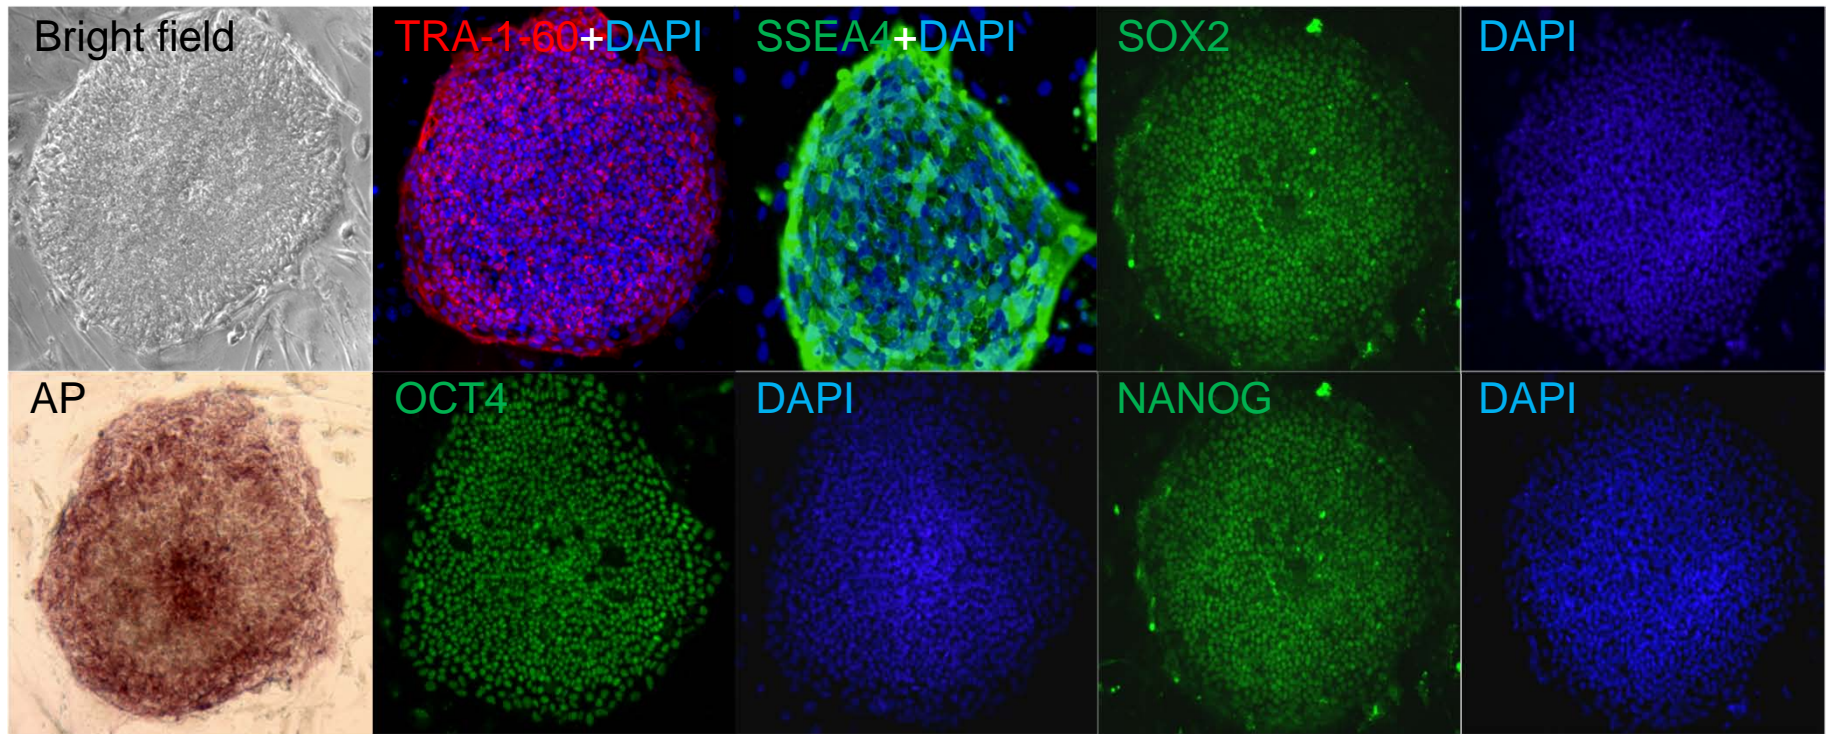

Donor fibroblast ID# AG05838

# Control1 iPS3

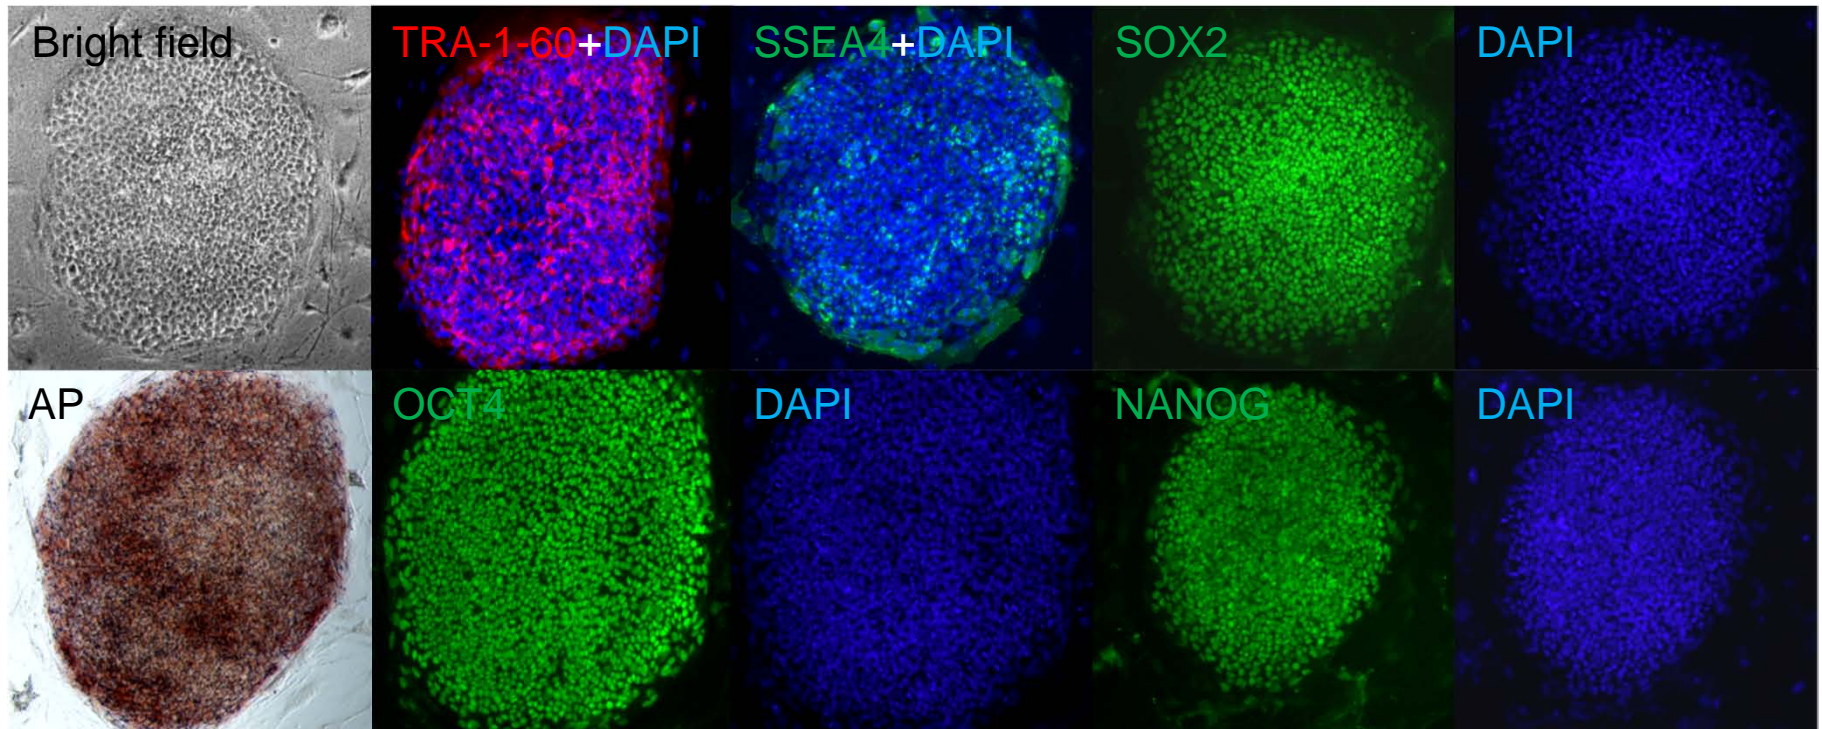

Donor fibroblast ID# AG05838



# Control2 iPS1

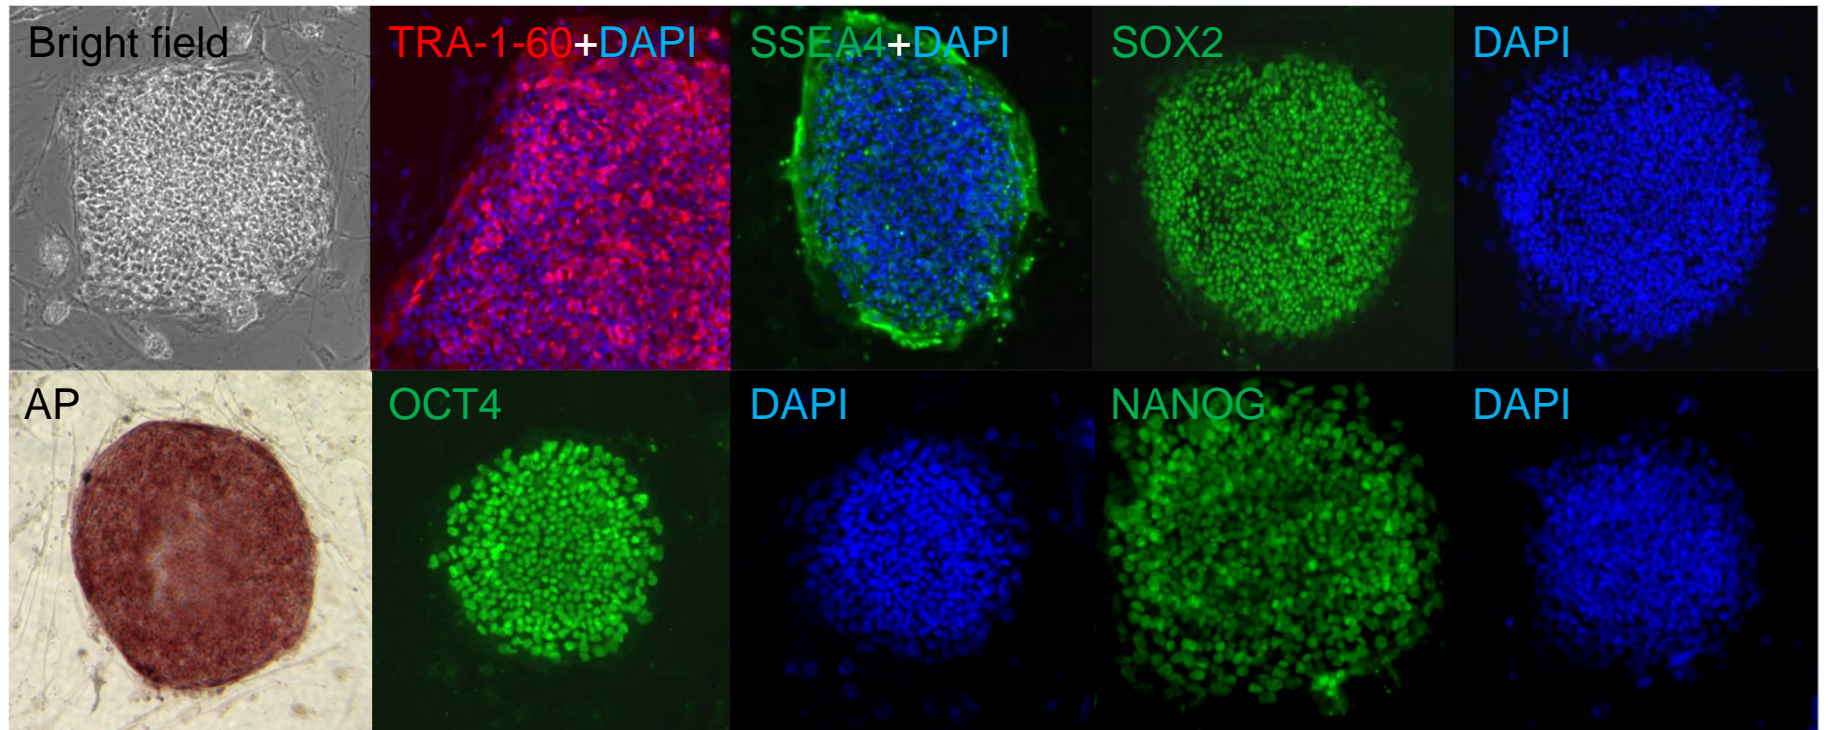

Donor fibroblast ID AG09599

# Control2 iPS3

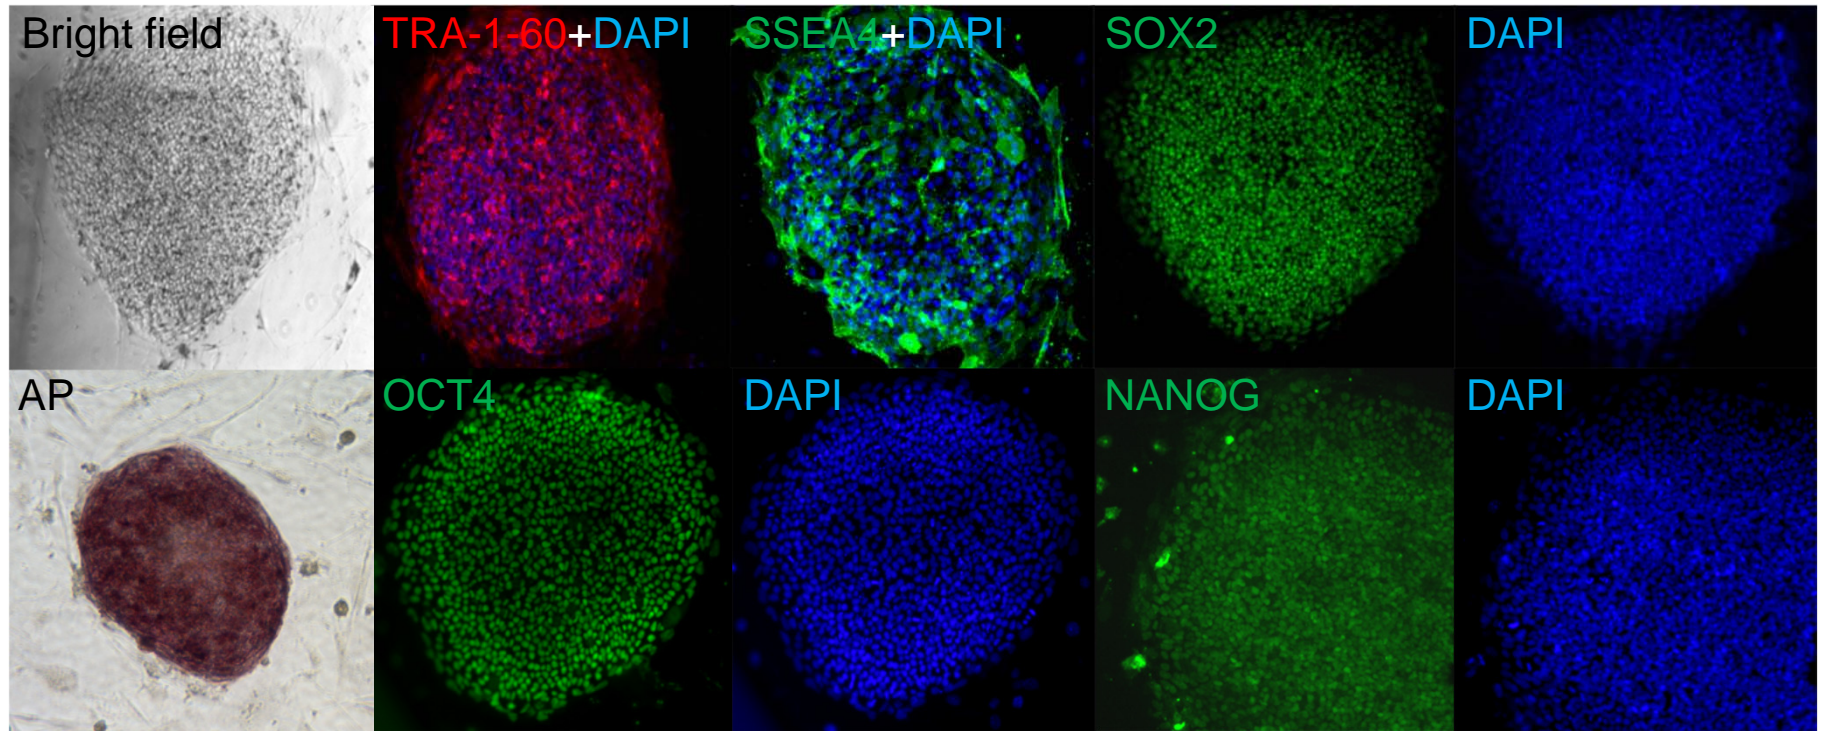

Donor fibroblast ID# AG09599



# Control2 iPS4

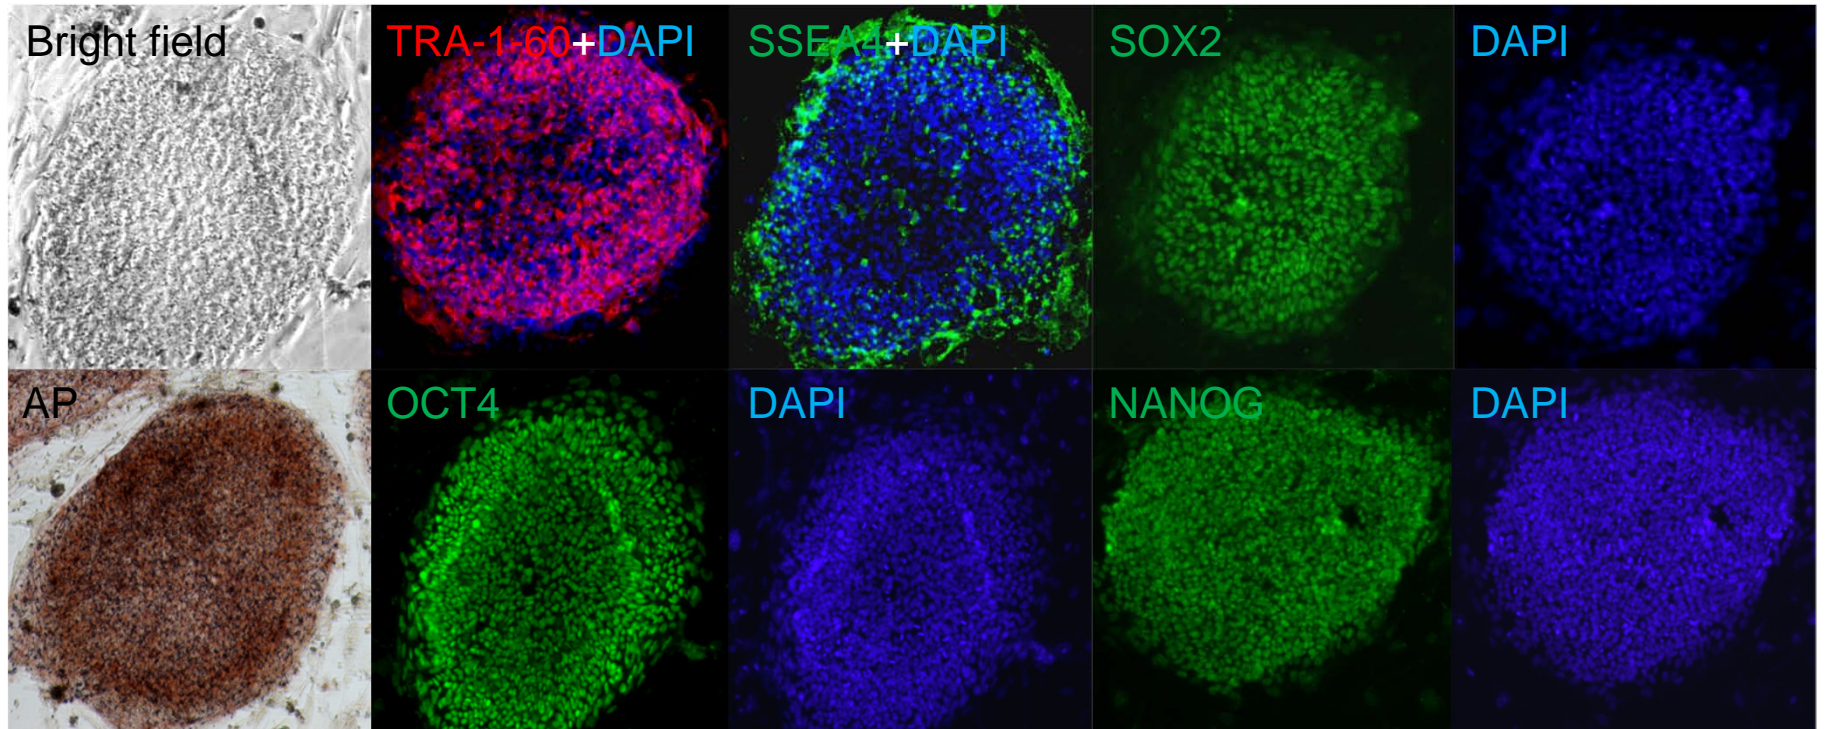

Donor fibroblast ID AG09599

# Control3 iPS1

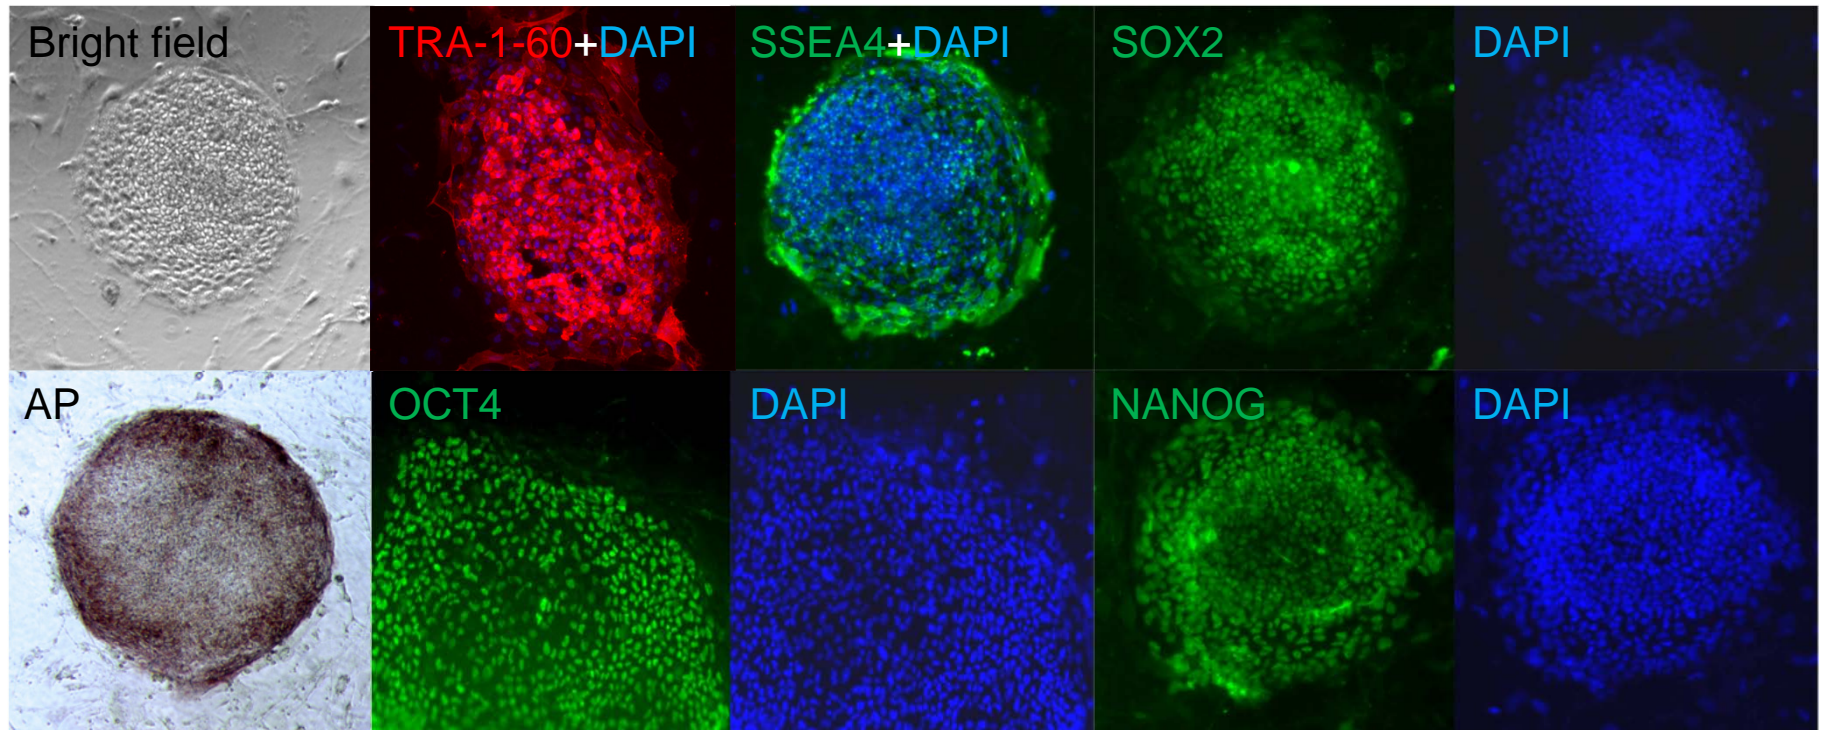

Donor fibroblast ID# AG13153



# PBD\_PEX1fs2 iPS3

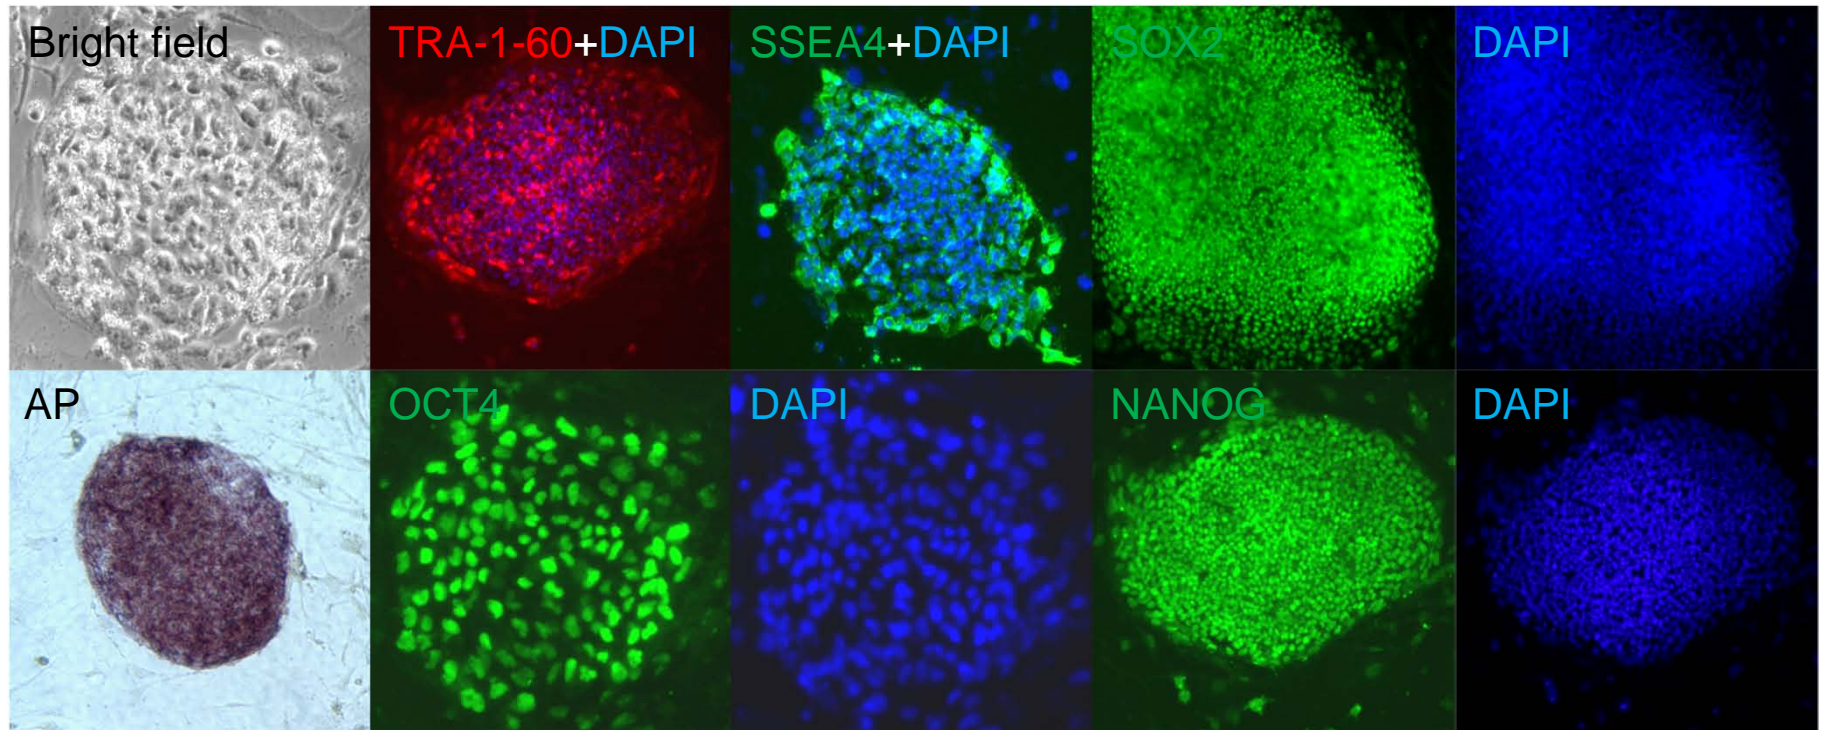

Donor Fibroblast ID# PBD702

# PBD\_PEX1fs1 iPS1

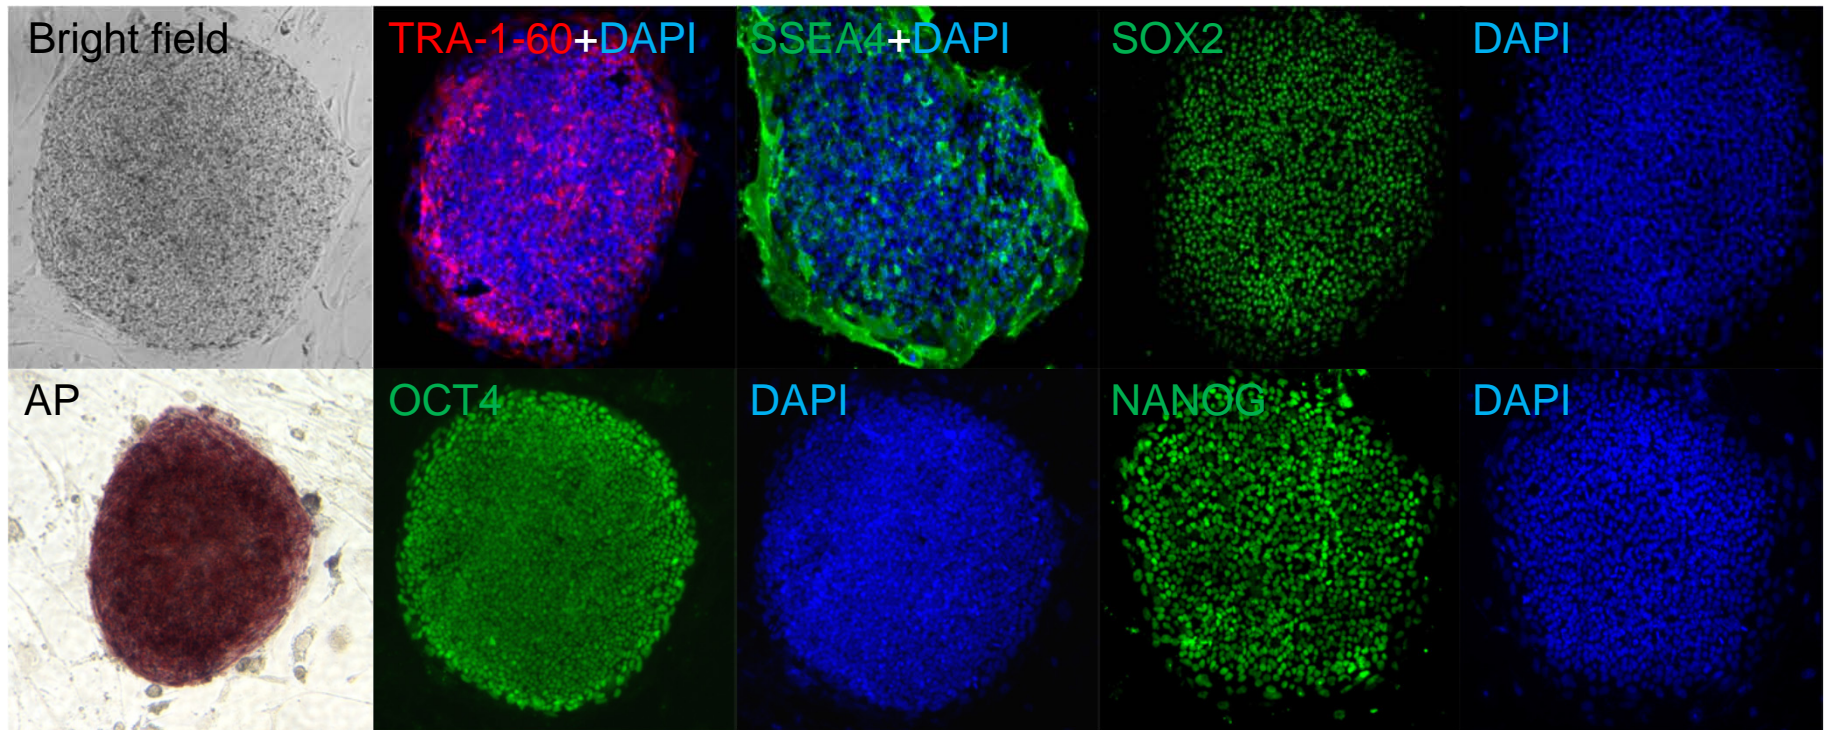

Donor Fibroblast ID# PBD721



# PBD\_PEX1fs1 iPS2

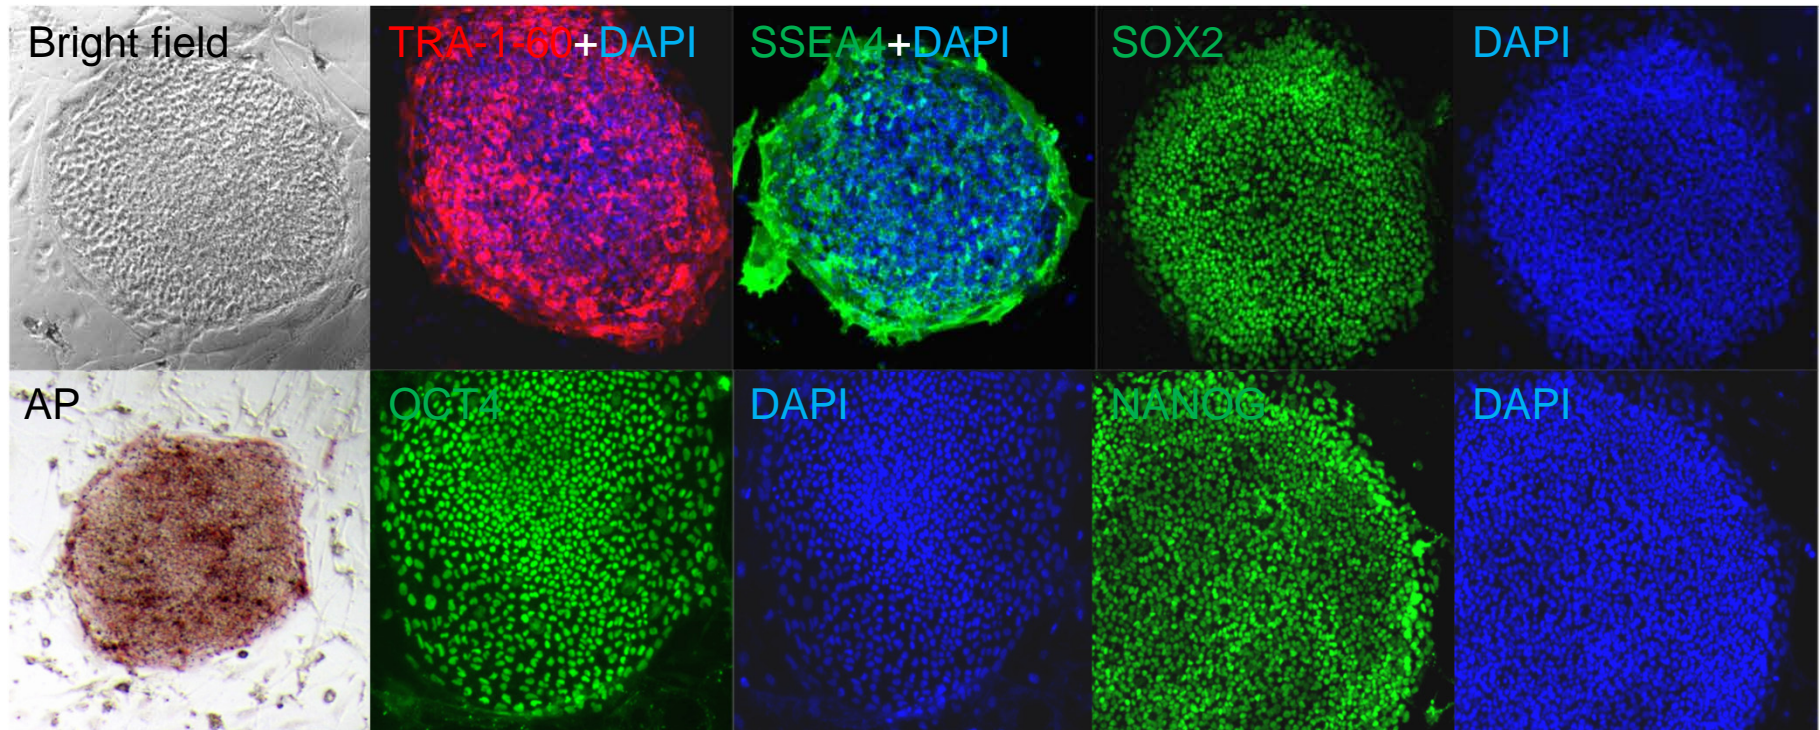

Donor Fibroblast ID# PBD721

# PBD\_PEX1ms1 iPS1

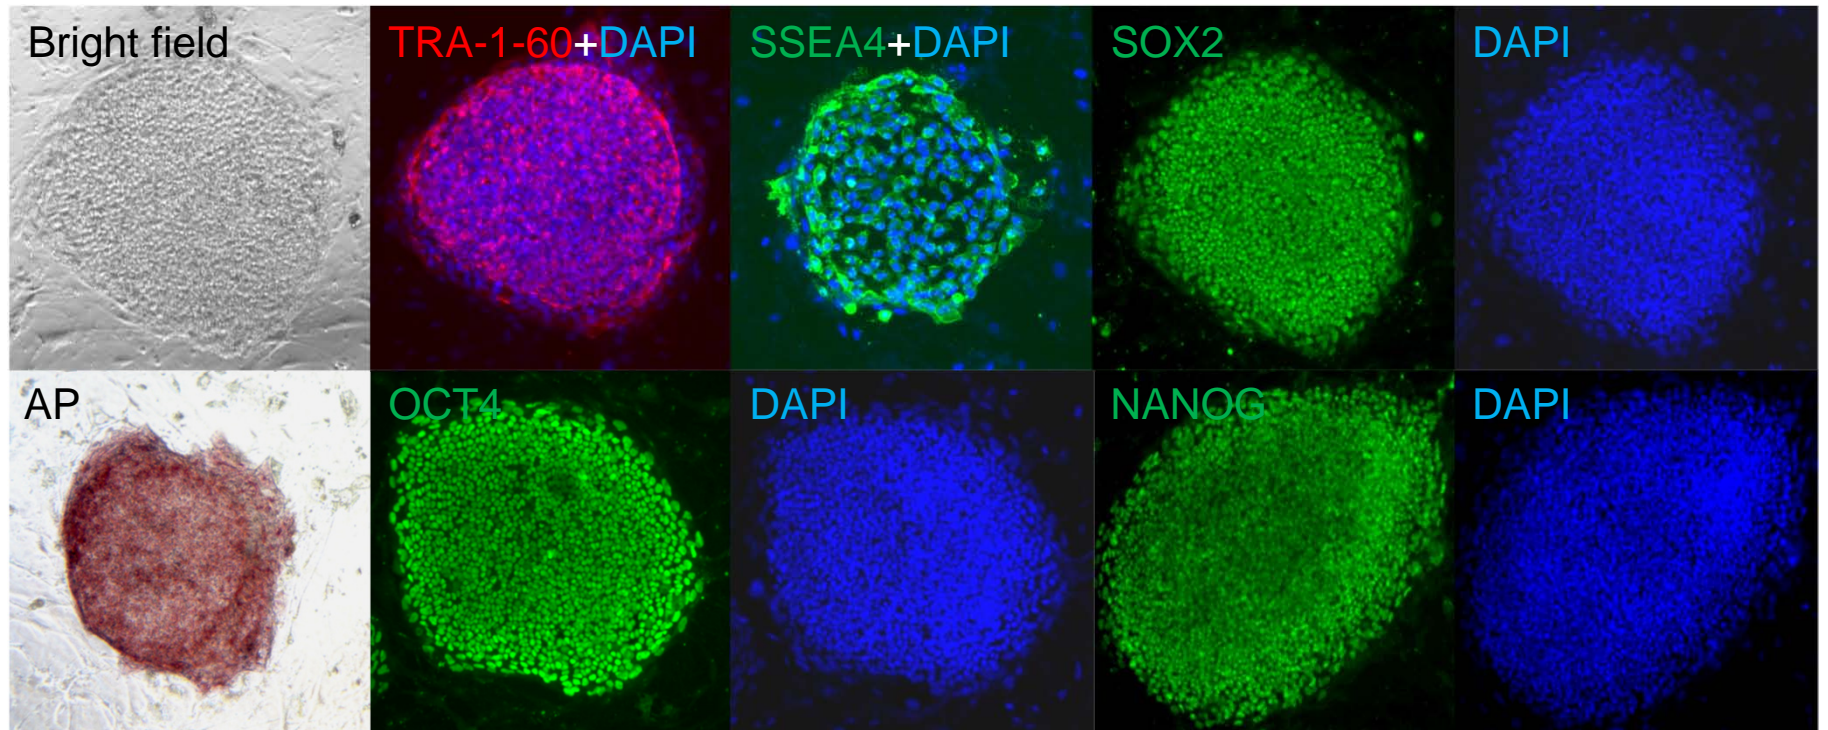

Donor Fibroblast ID# PBD615



# PBD\_PEX1ms1 iPS2

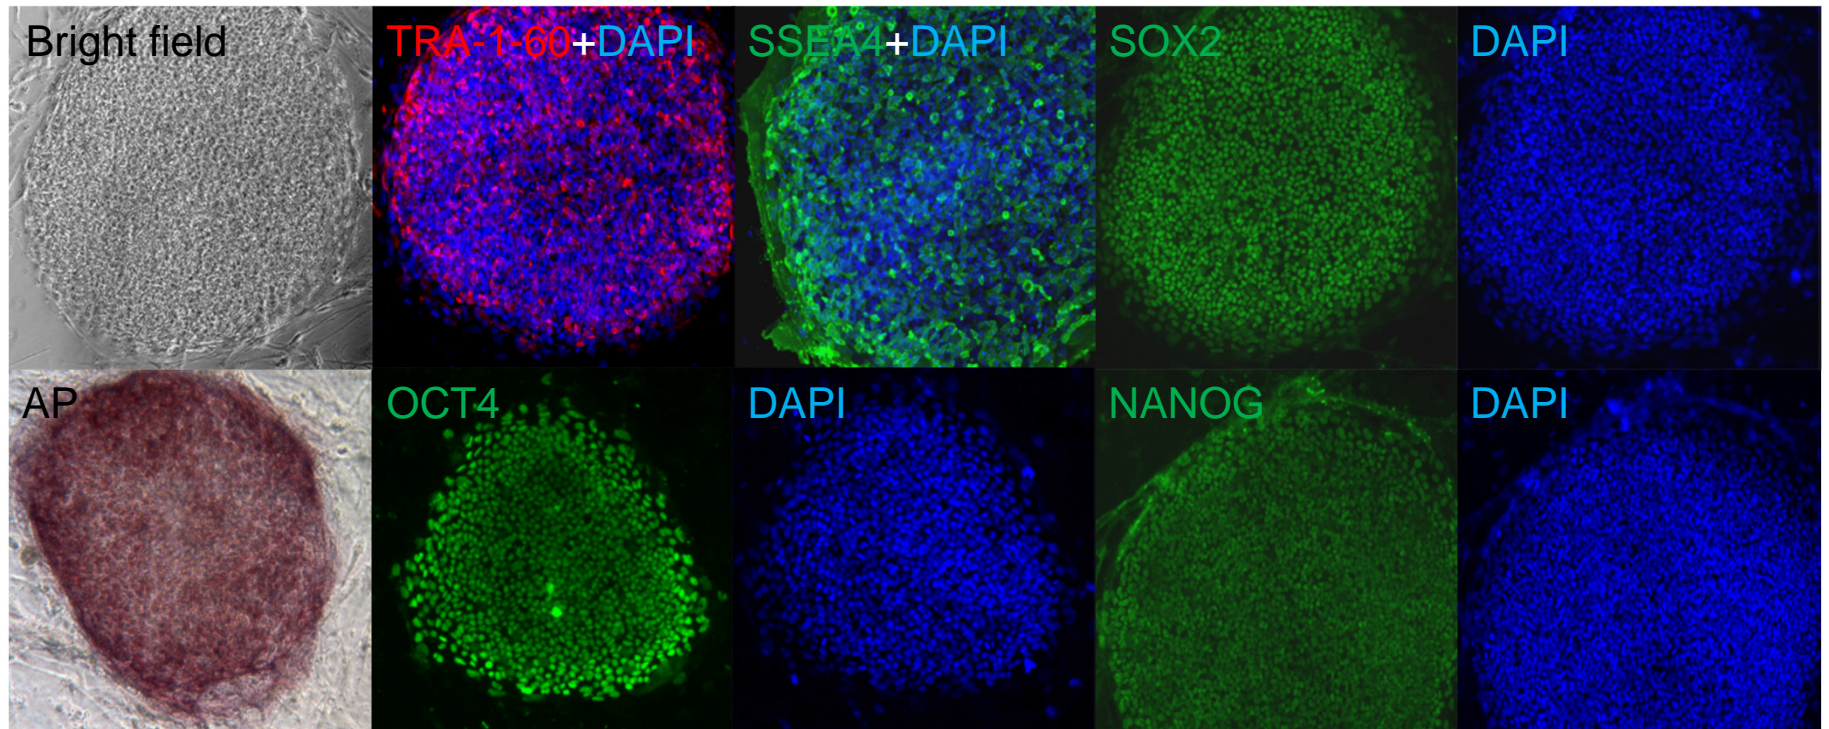

Donor Fibroblast ID# PBD615

# PBD\_PEX1ms1 iPS4

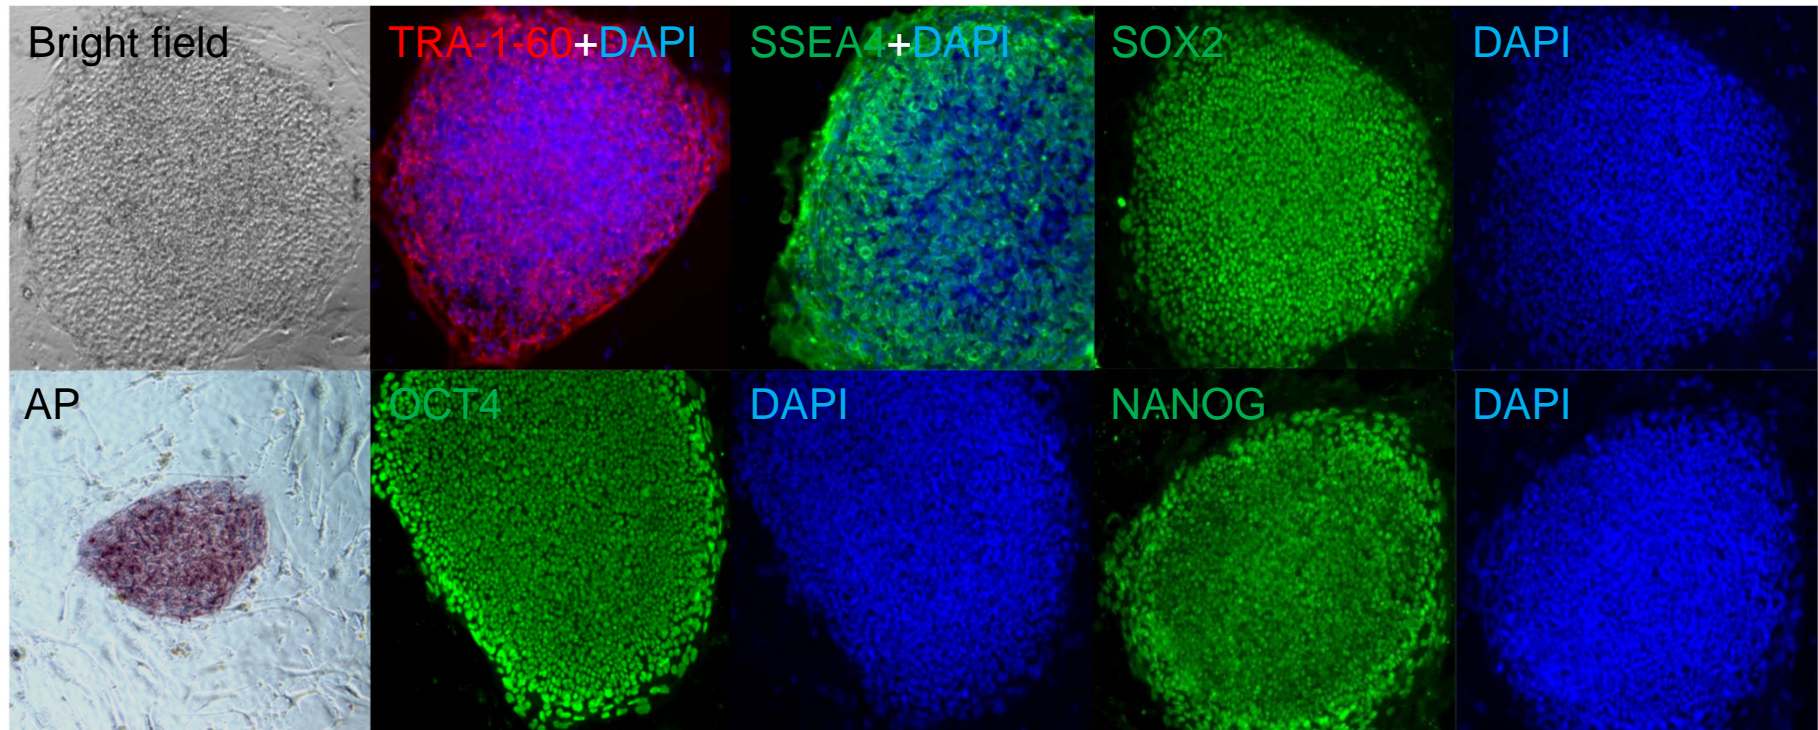

Donor Fibroblast ID# PBD615



# PBD\_PEX1ms1 iPS5

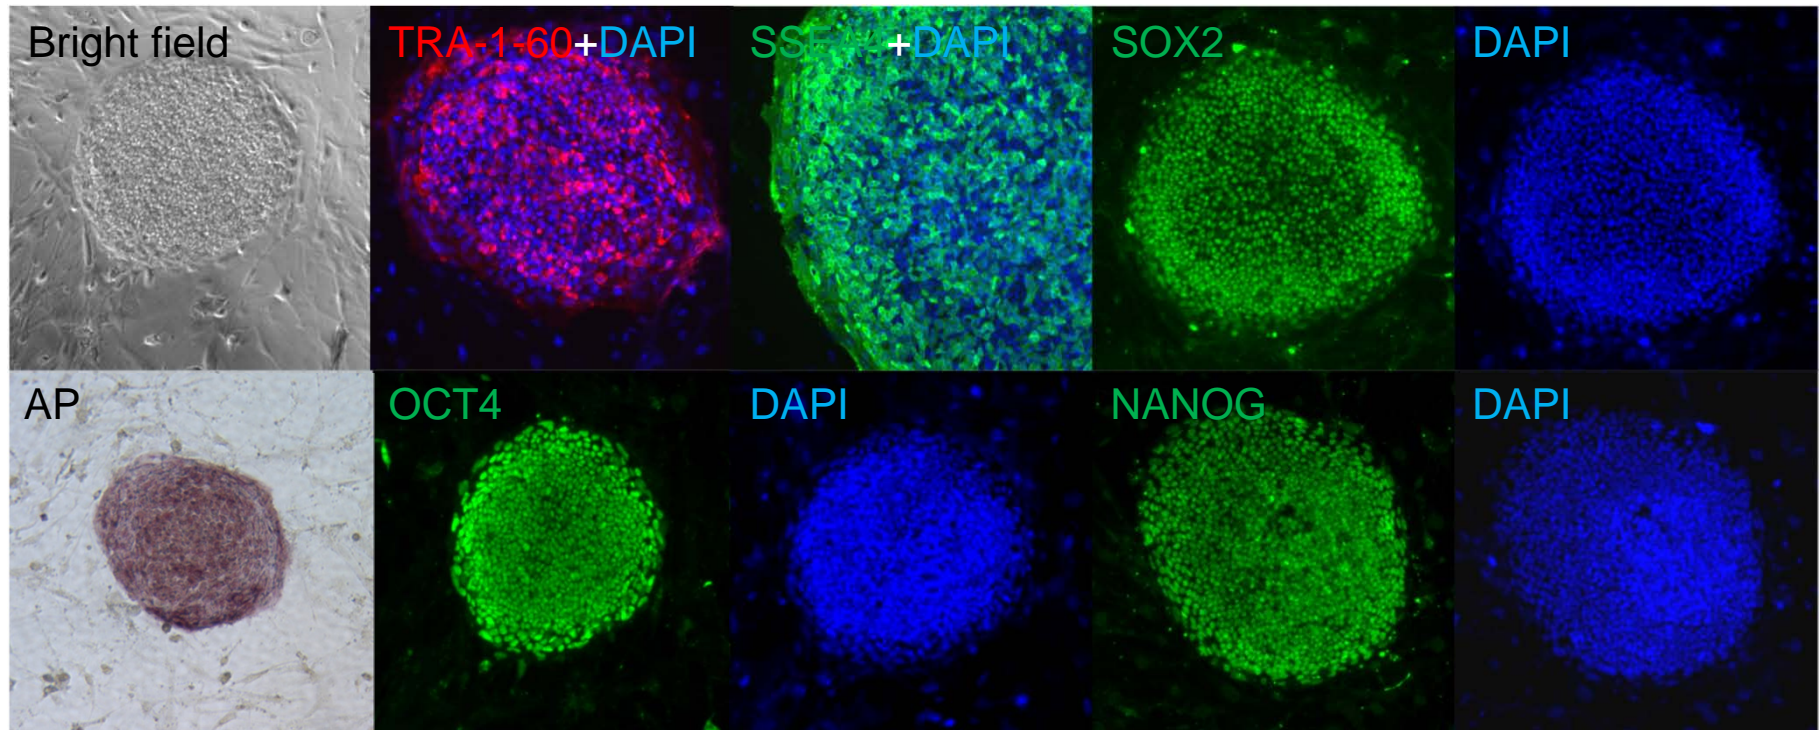

Donor Fibroblast ID# PBD615

# PBD\_PEX1ms2 iPS1

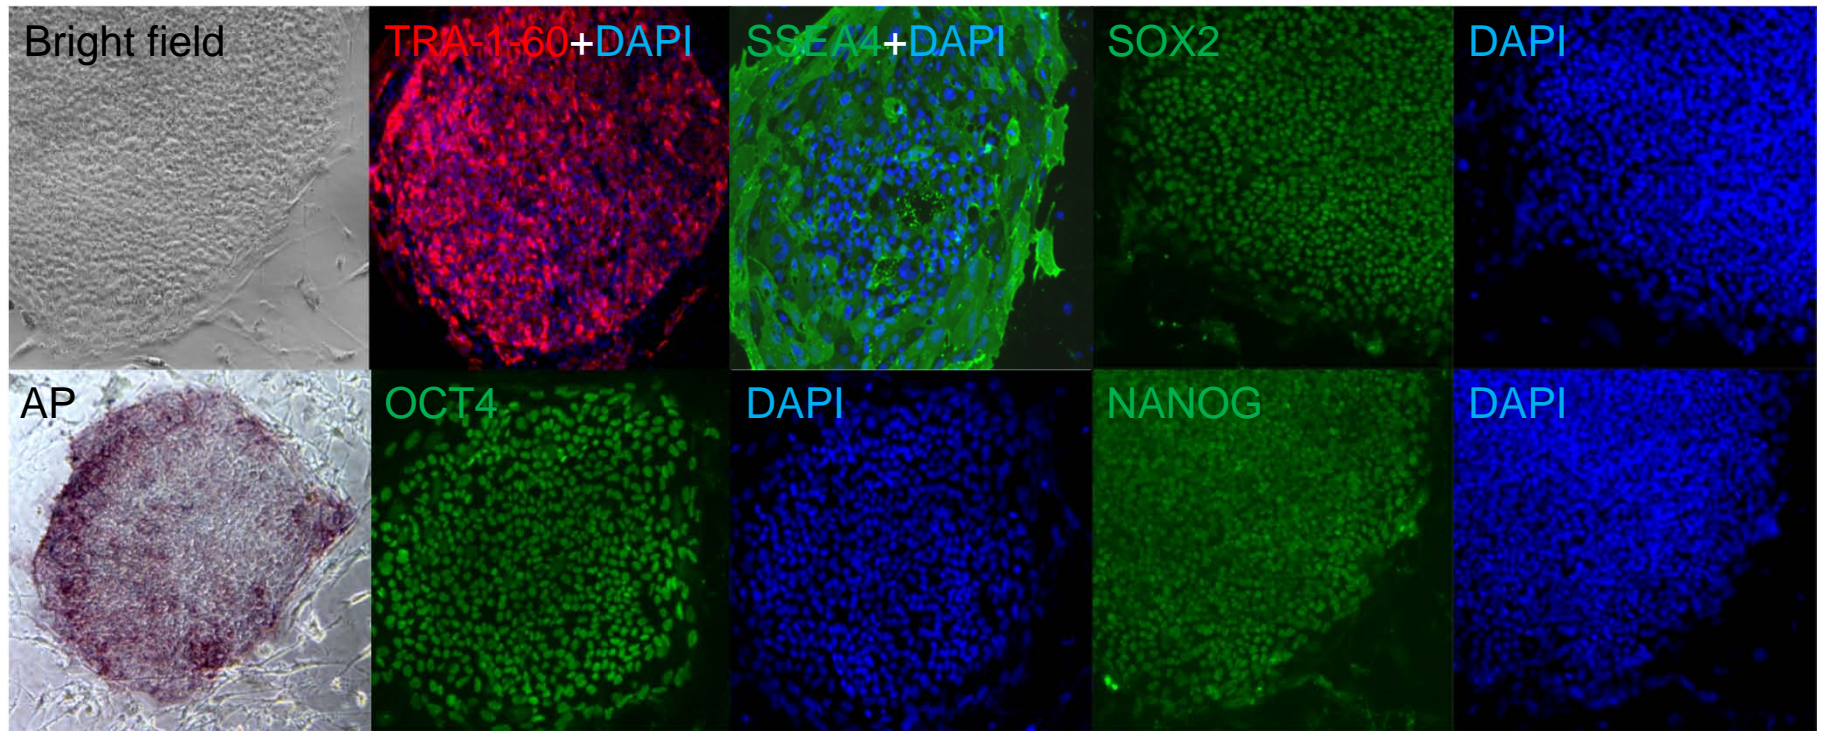

Donor Fibroblast ID# PBD643



# PBD\_PEX1ms2 iPS2

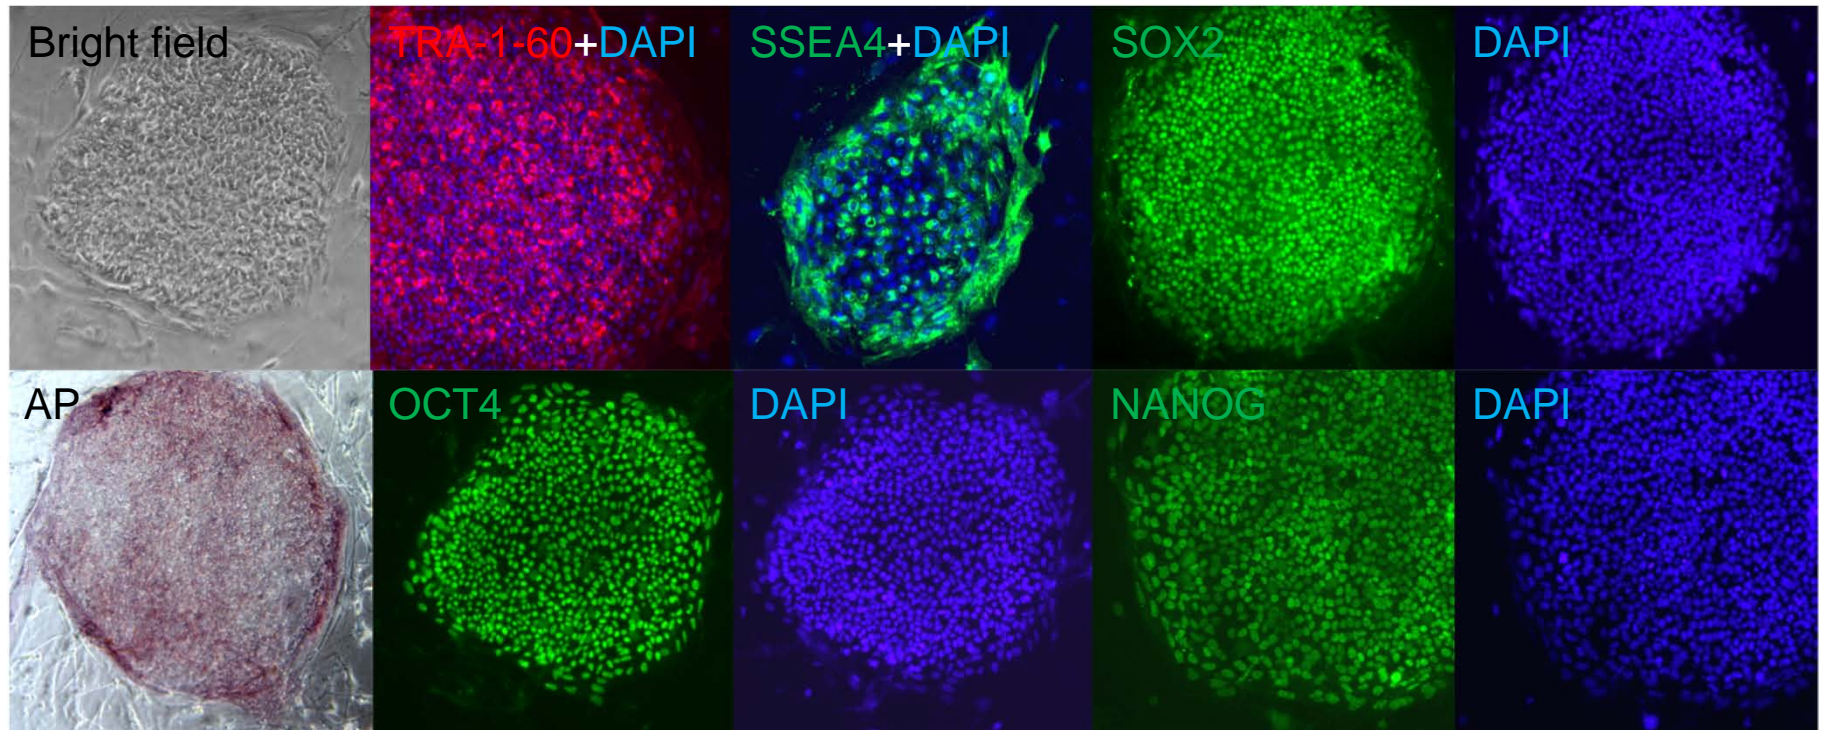

Donor Fibroblast ID# PBD643

# PBD\_PEX12 iPS1

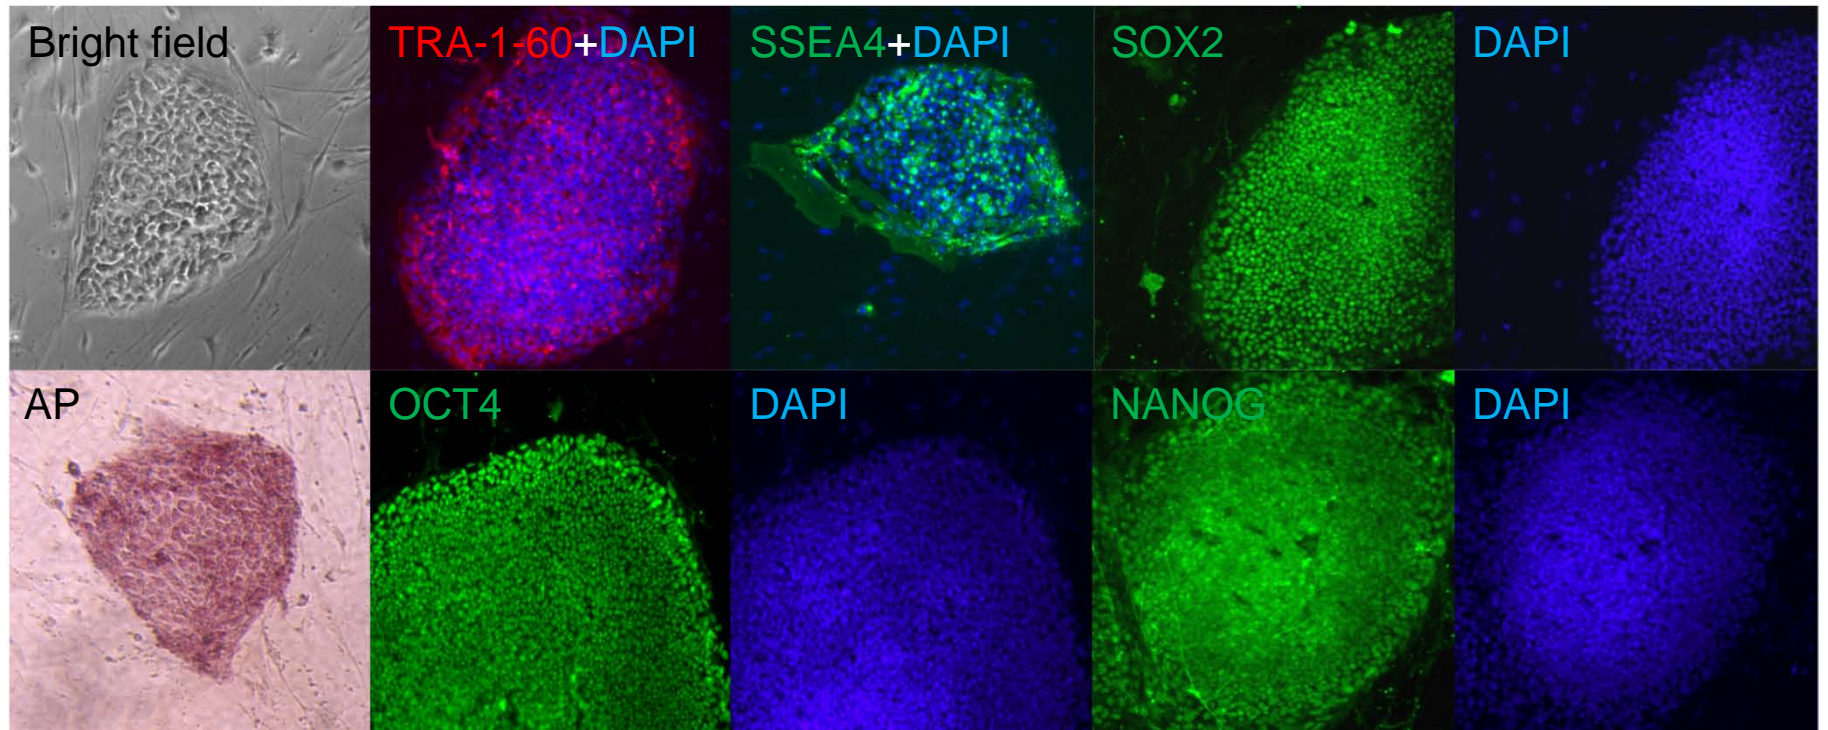

Donor Fibroblast ID# PBD673



# PBD\_PEX10 iPS2

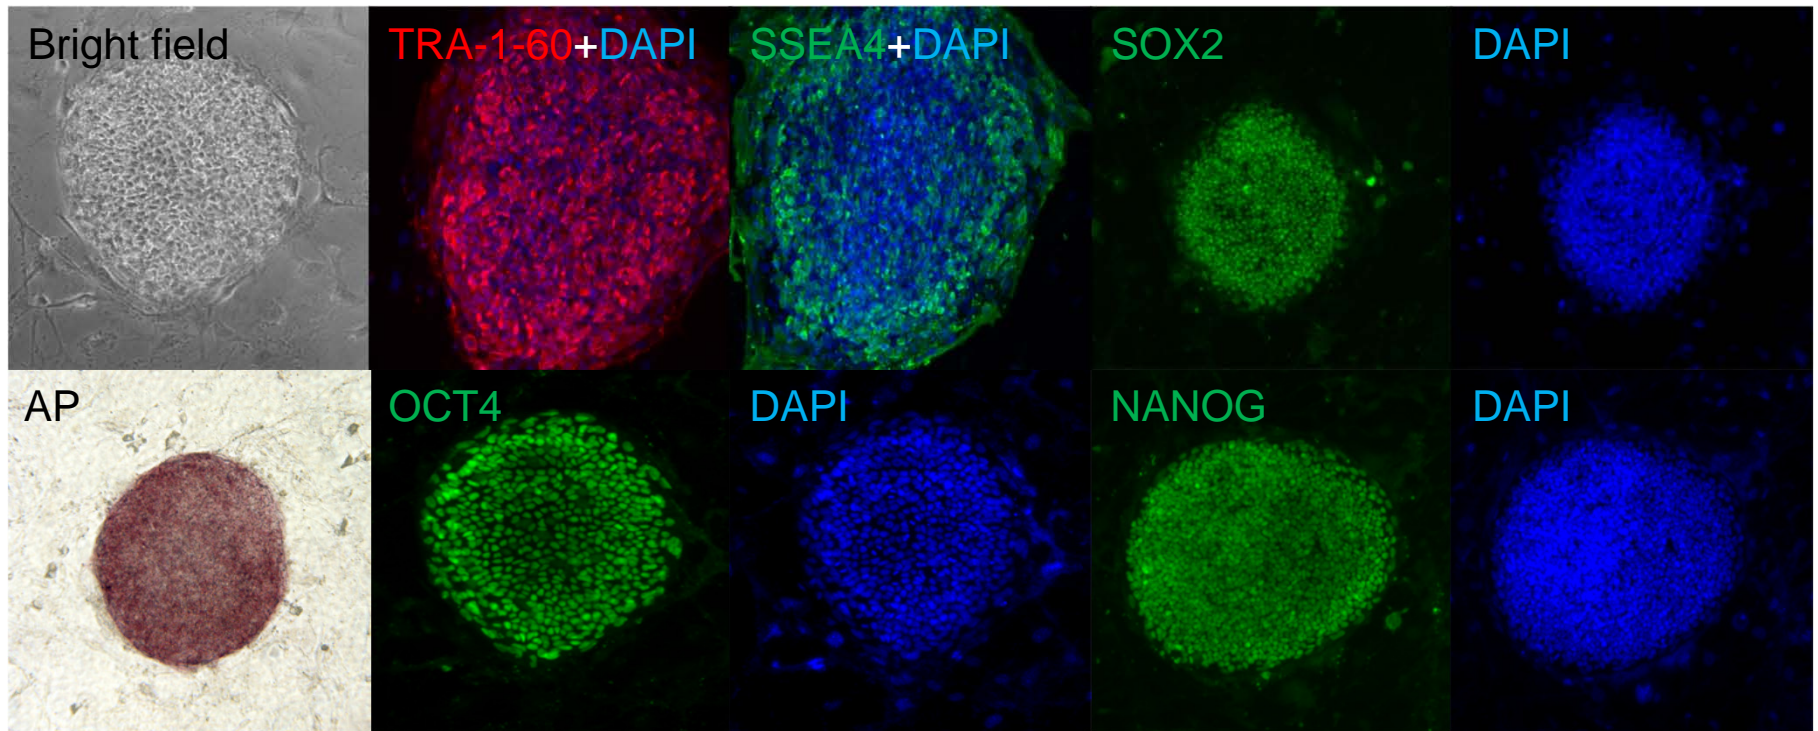

Donor Fibroblast ID# PBD687

# PBD\_PEX12 iPS2

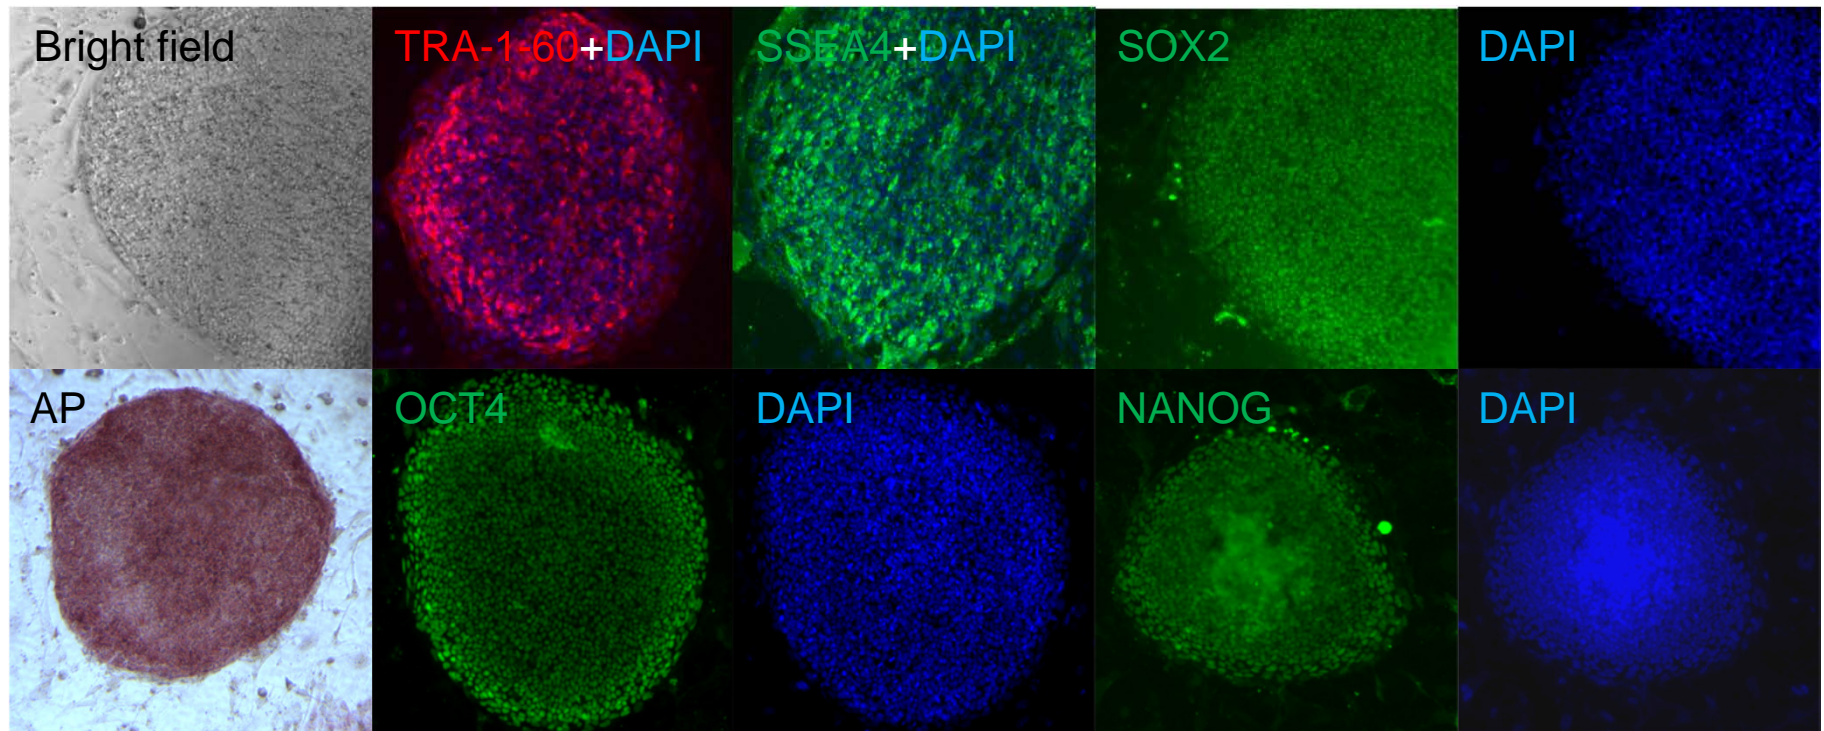

Donor Fibroblast ID# PBD673



# PBD\_PEX12 iPS3

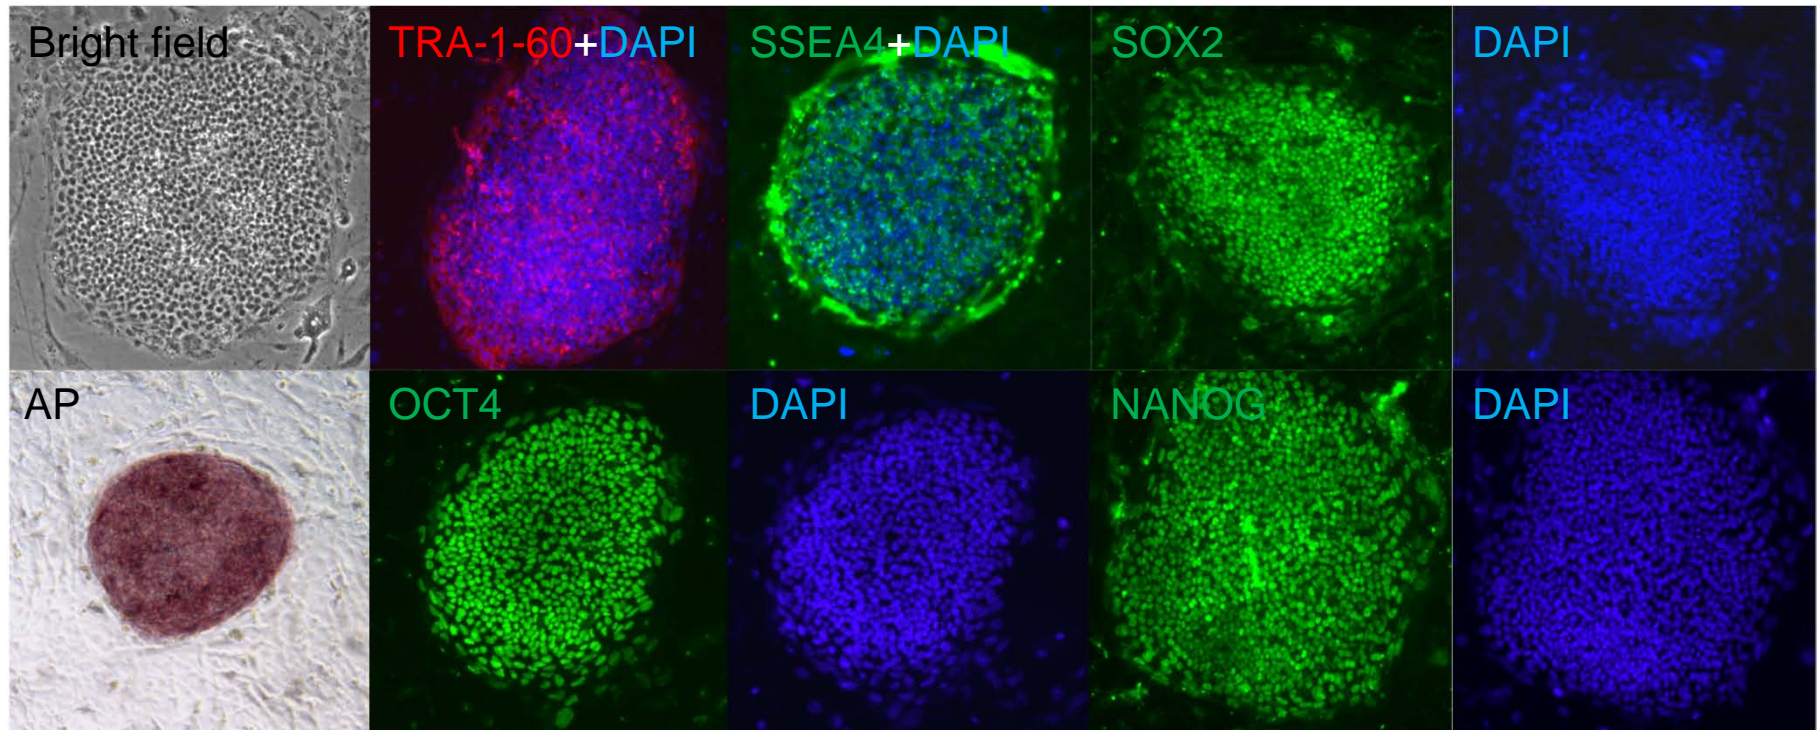

Donor Fibroblast ID# PBD673

# PBD\_PEX26 iPS1

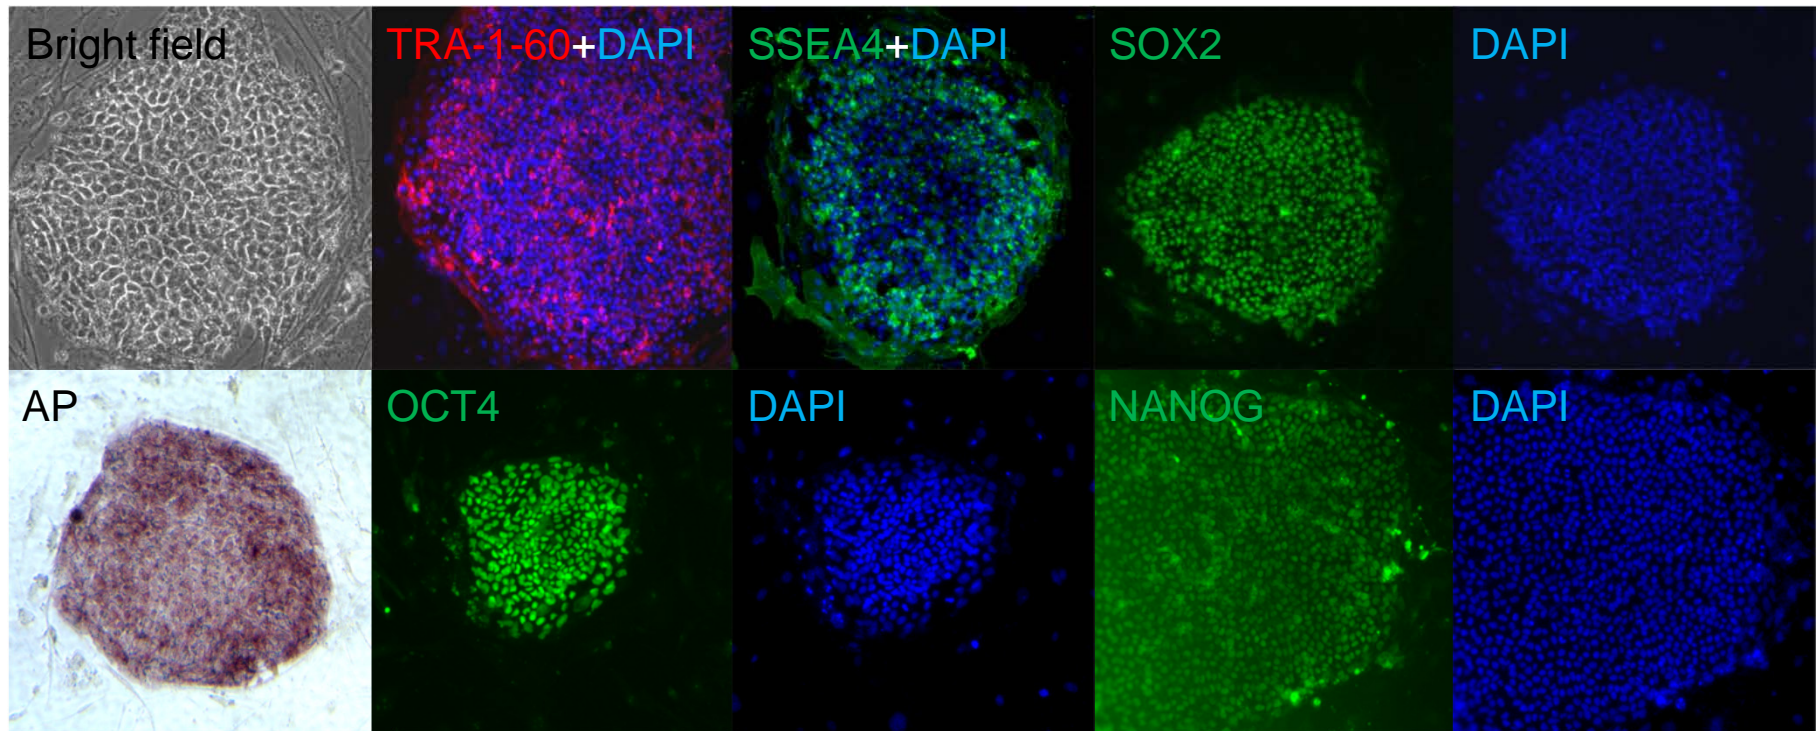

Donor Fibroblast ID# PBD604



# PBD\_PEX26 iPS2

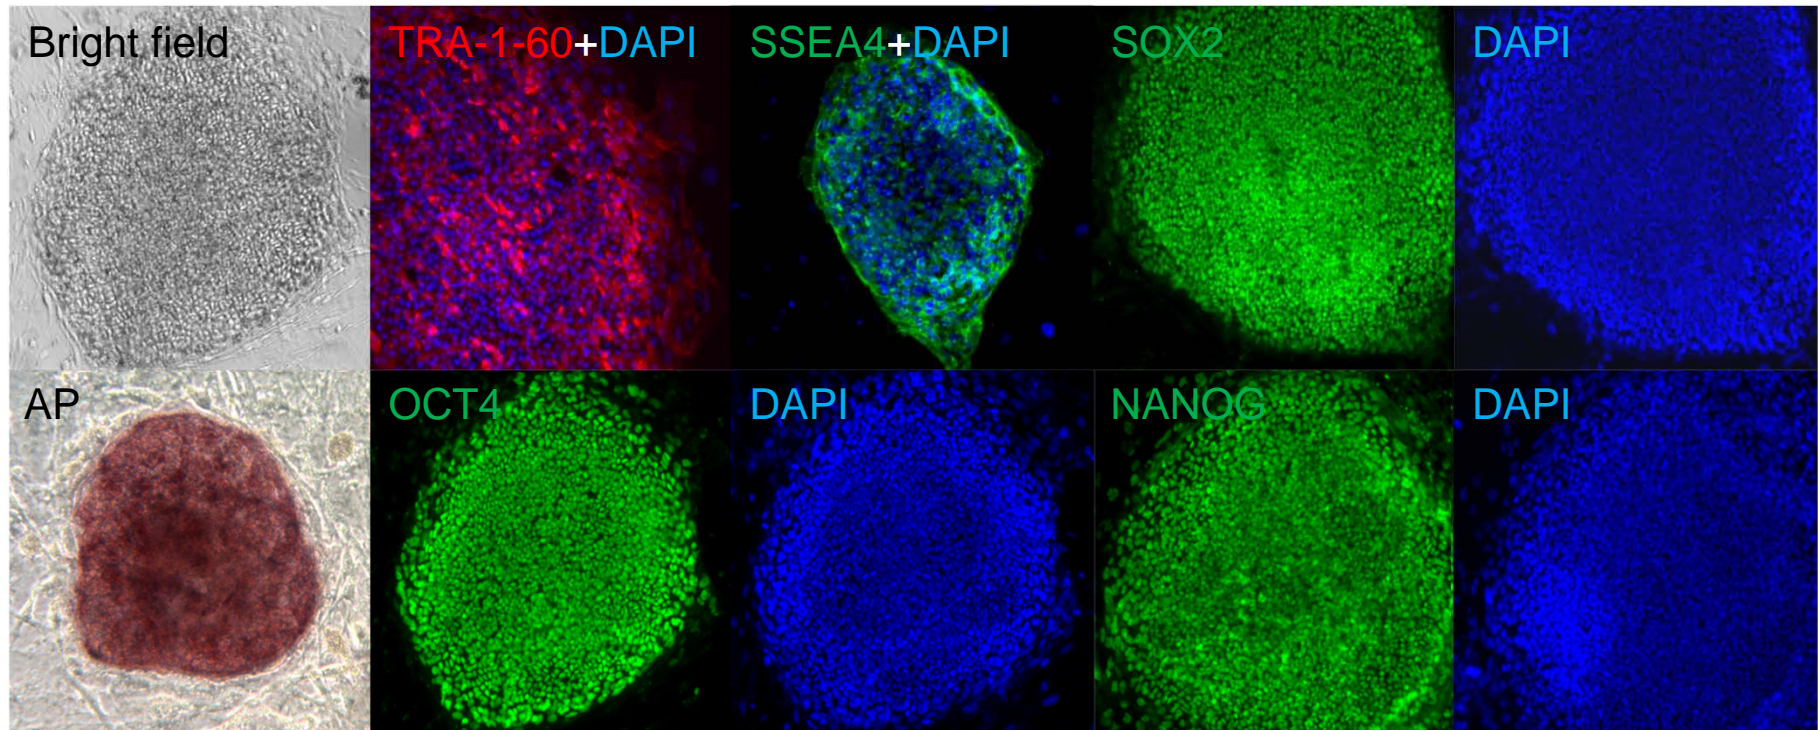

Donor Fibroblast ID# PBD604
