# Supplementary material for: Induced pluripotent stem cell models of Zellweger spectrum disorder show impaired peroxisome assembly and cell type-specific lipid abnormalities
Source: PubMed Central journal article supplement (PMC4553005; doi:10.1186/s13287-015-0149-3), 2015-08-29
Supplement: 13287_2015_149_MOESM11_ESM.pdf [file 13287_2015_149_MOESM11_ESM.pdf]

# Neural Progenitor Markers for Controls

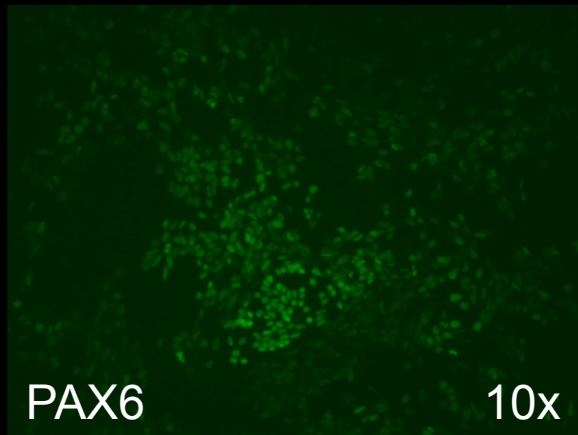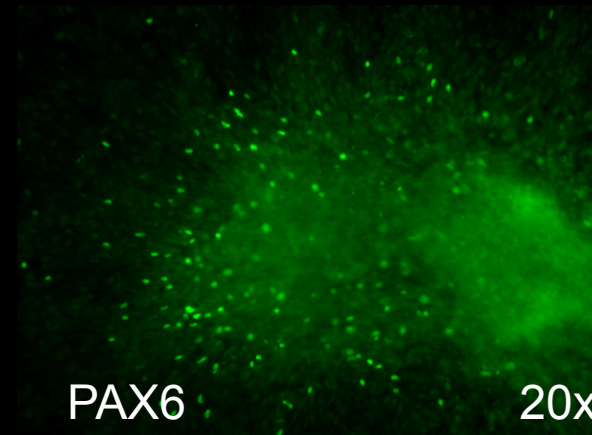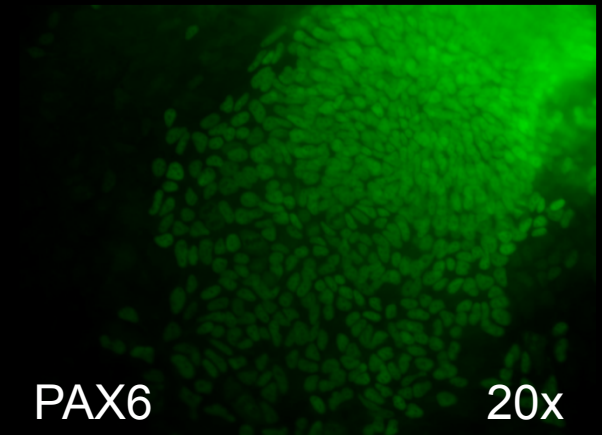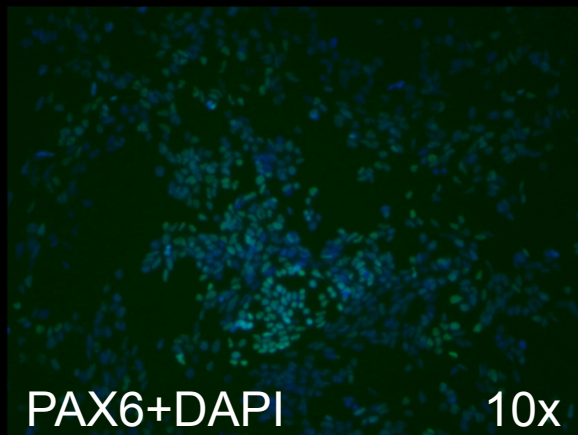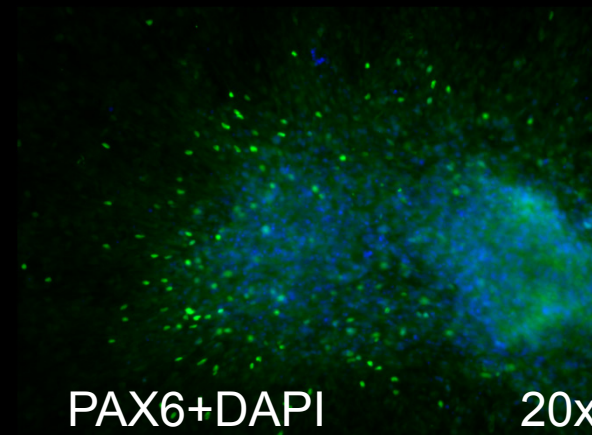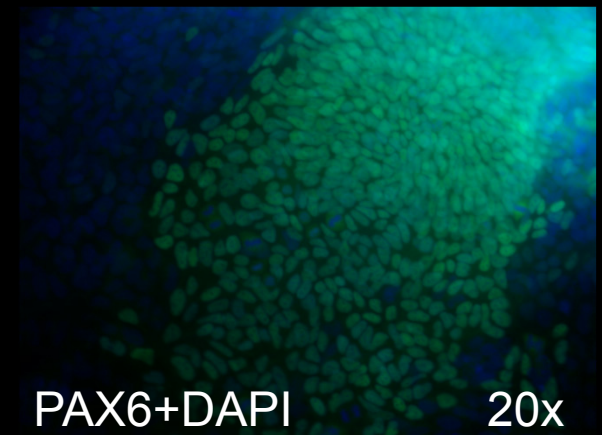

**Control1**  
**iPS1-derived**

**Control2**  
**iPS3-derived**

**Control2**  
**iPS3-derived**

# Motor Neuron Progenitor Markers for Controls

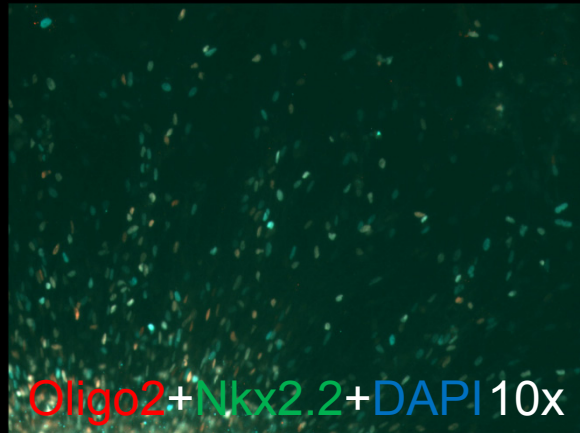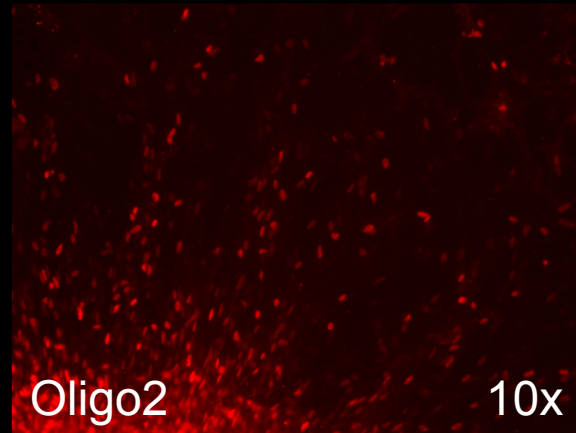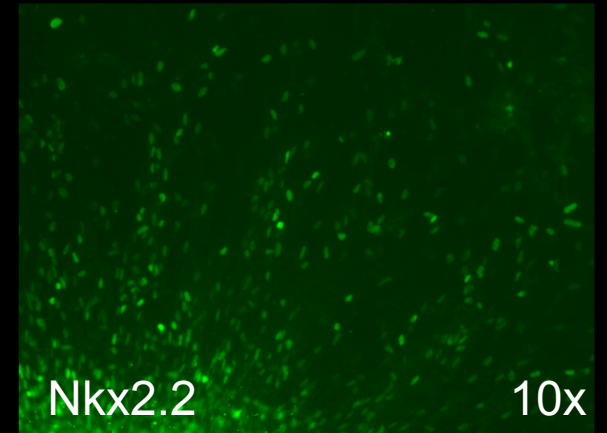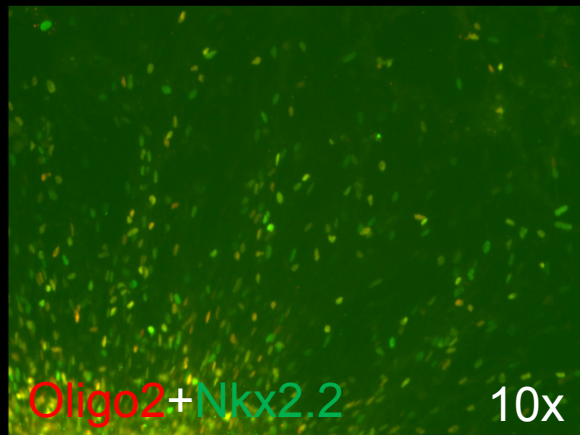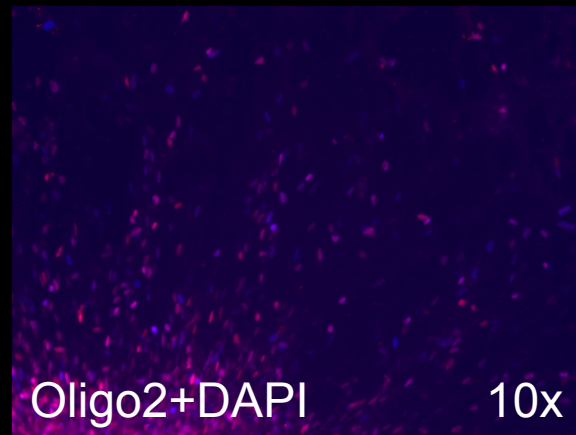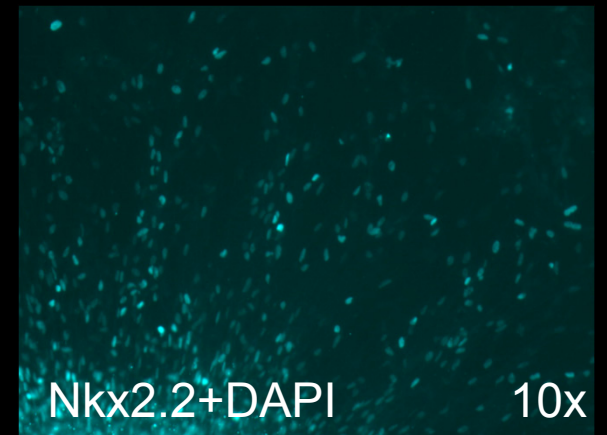

**All Control1iPS1-derived**

# Motor Neuron Progenitor Markers for Controls

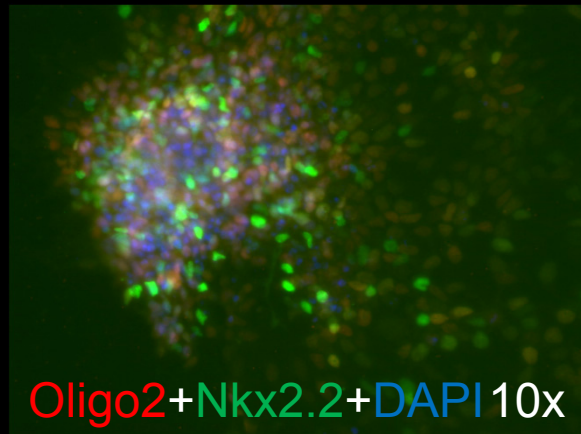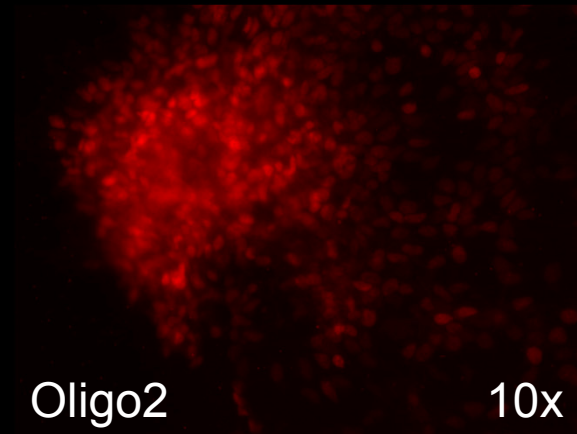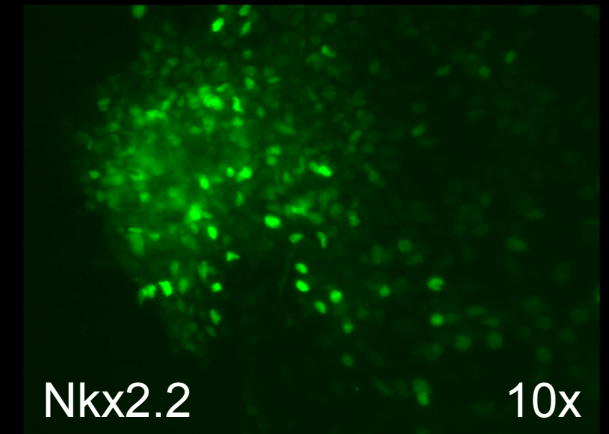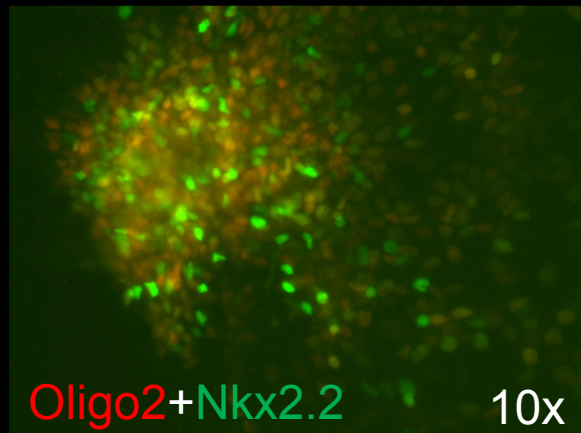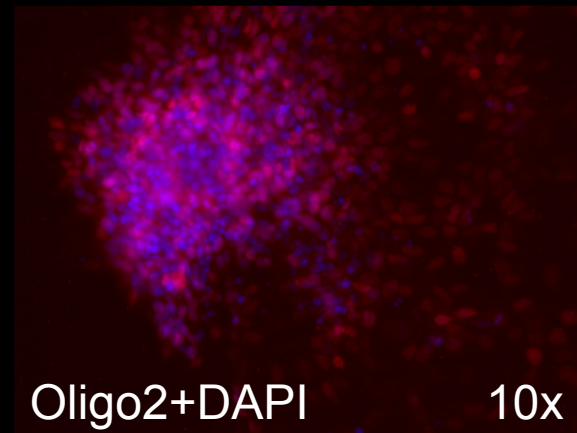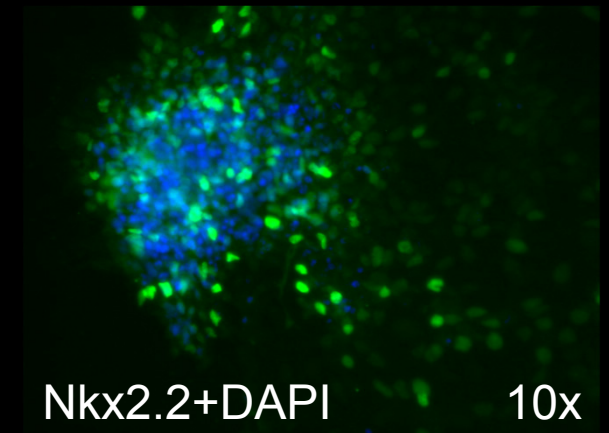

**All Control2 iPS3-derived**



# Motor Neuron Progenitor Markers for Controls

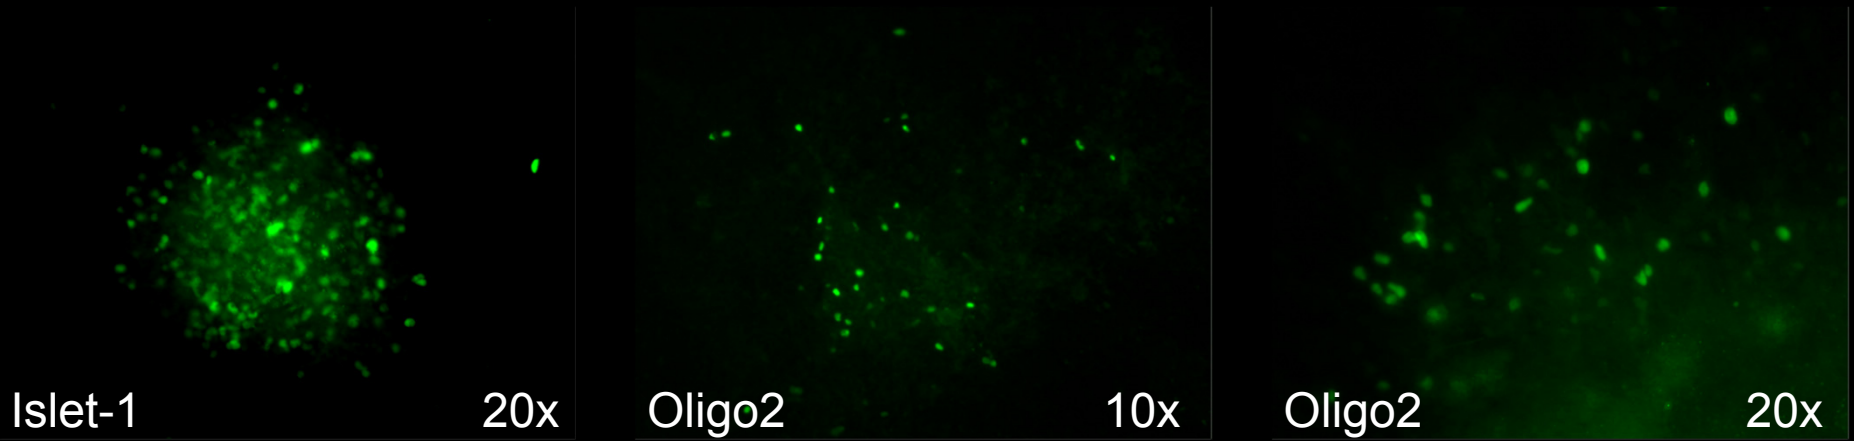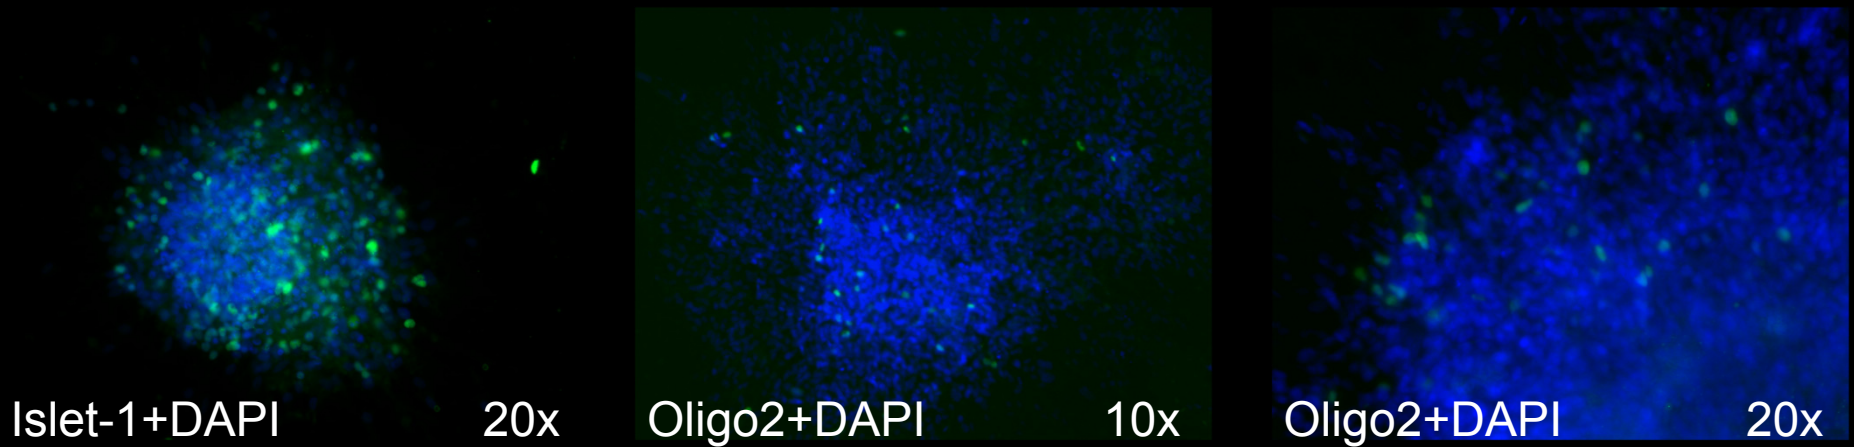

**Control2 iPS1-  
derived**

**Control2 iPS3-  
derived**

**Control2 iPS3-  
derived**



# Motor Neuron Progenitor Markers for Controls

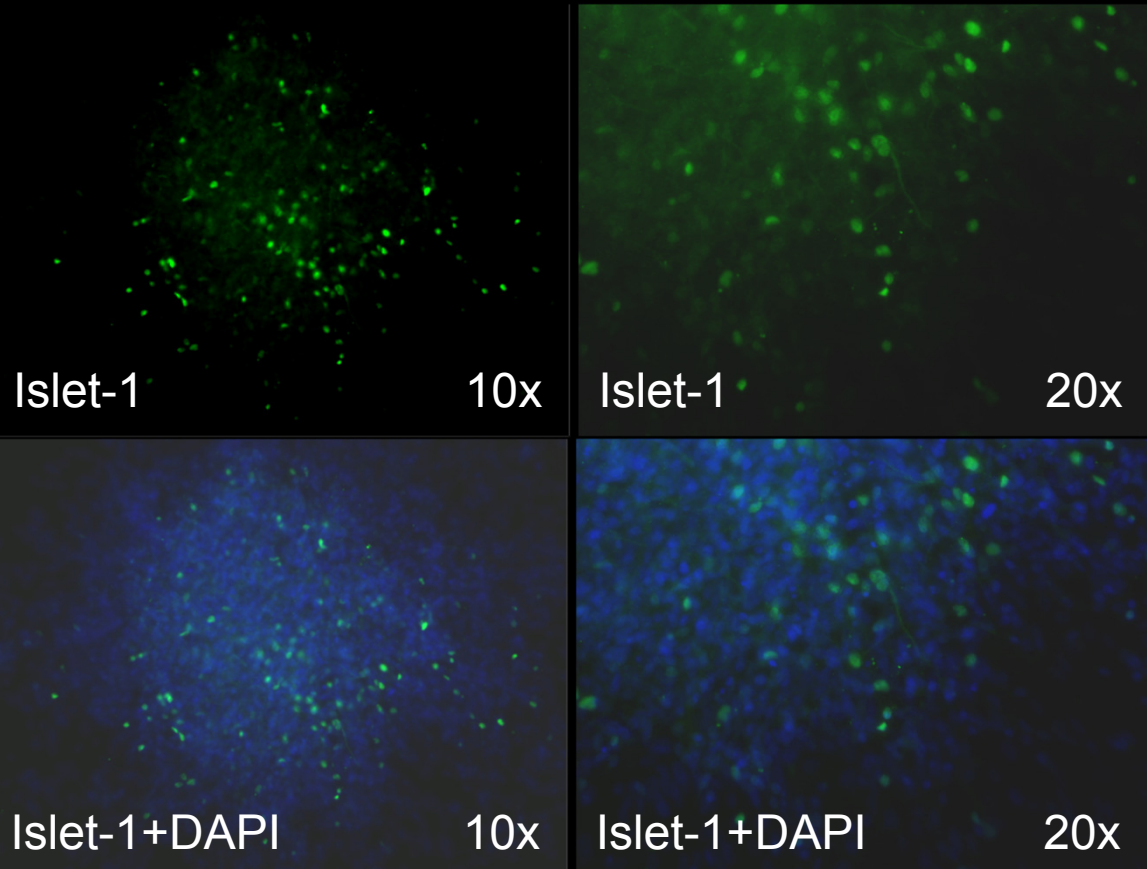

**All Control2 iPS3-derived**

# Neuron Markers for Controls

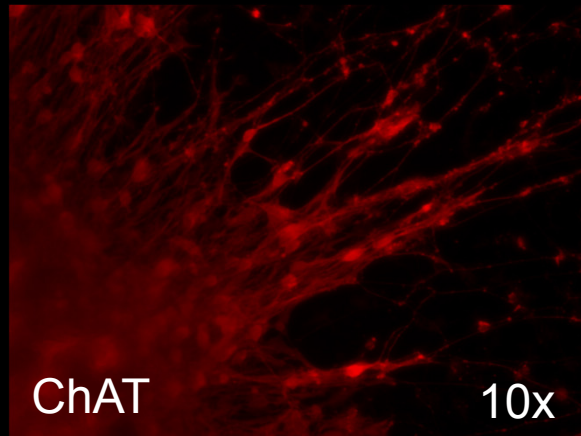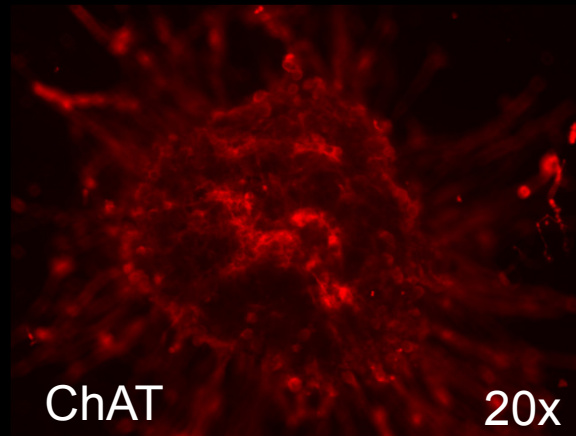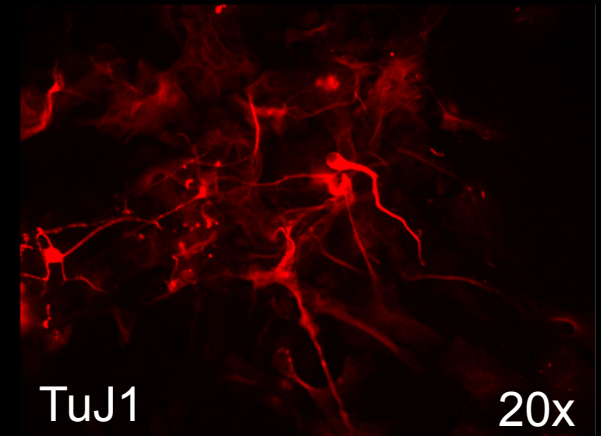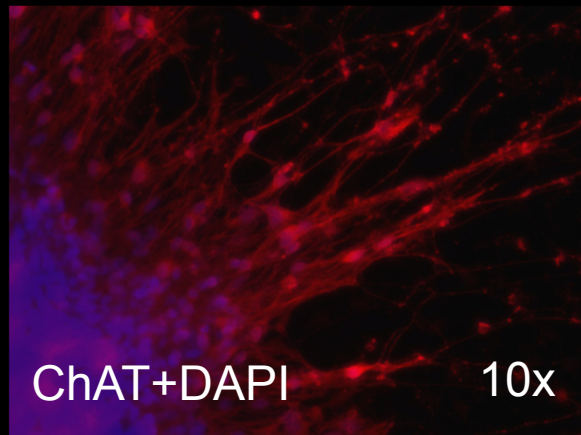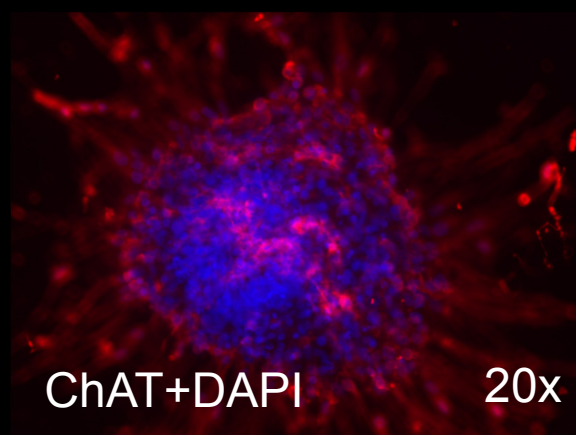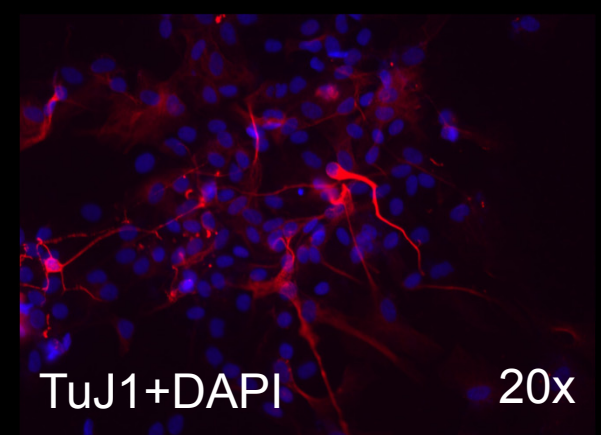

**All are Control2 iPS1-derived**

# Neuron Markers for Controls

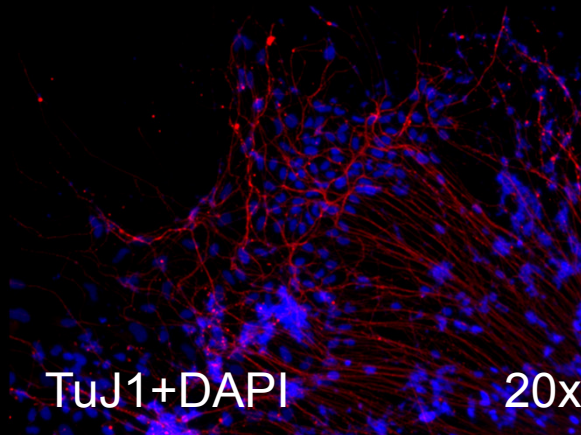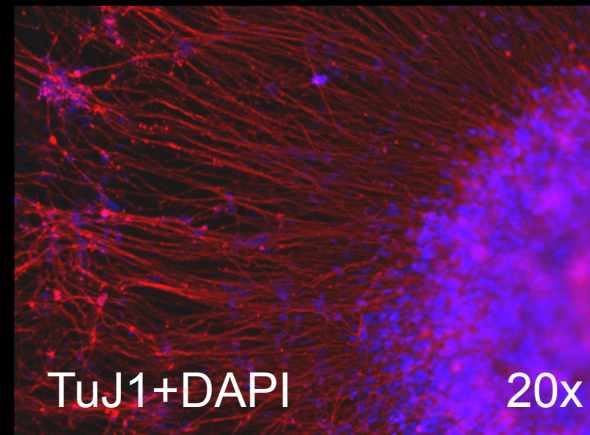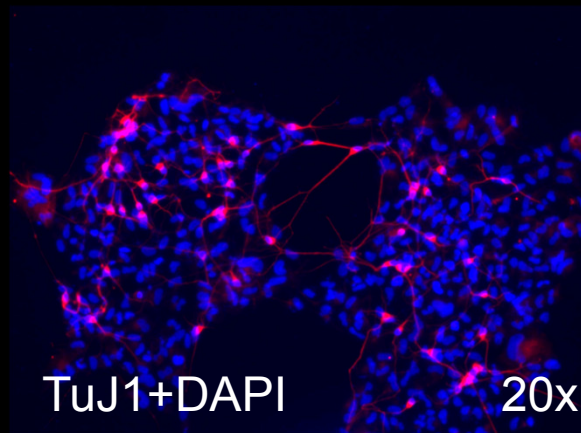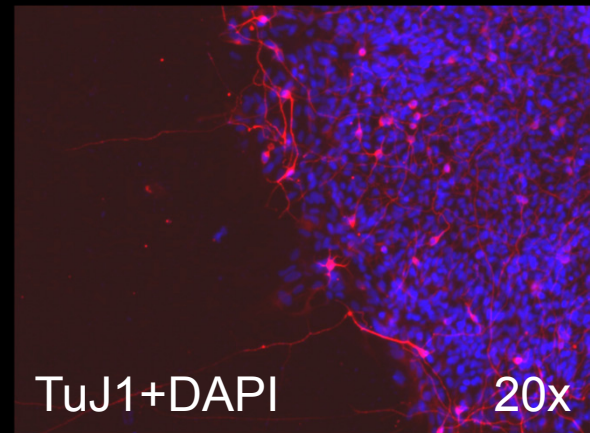

**All are Control2 iPS3-derived**



# Neuron Markers for Controls

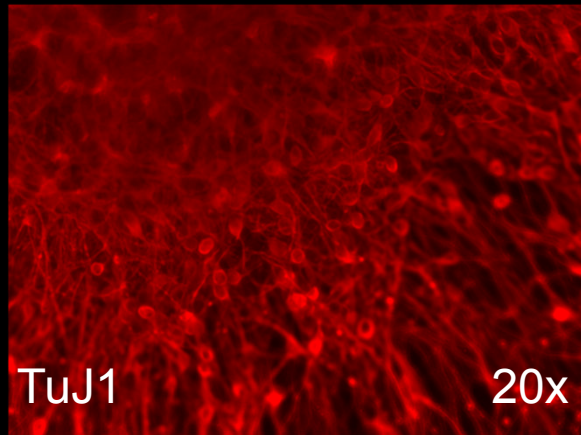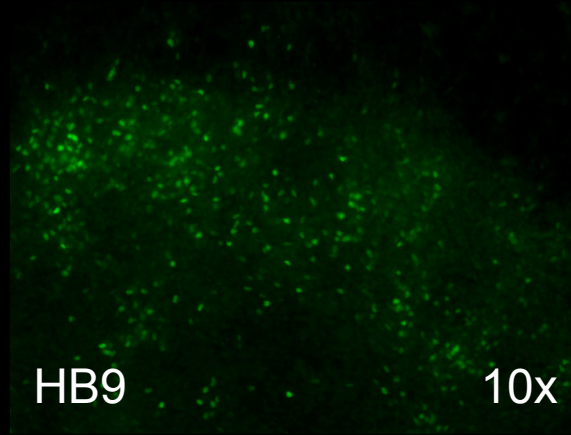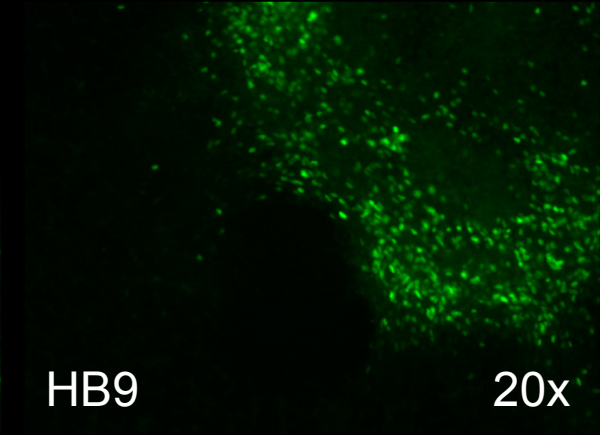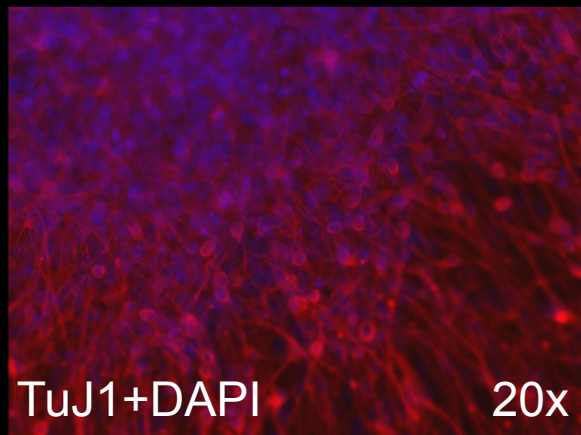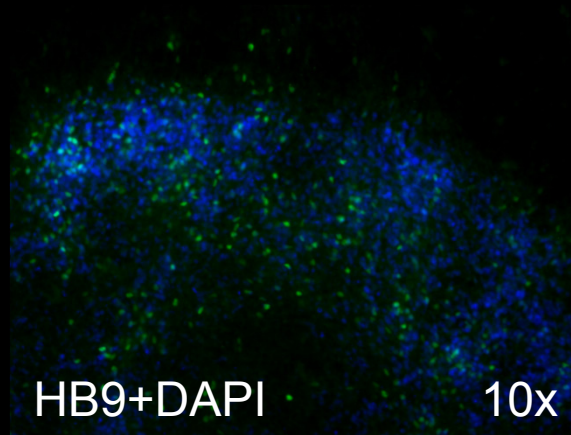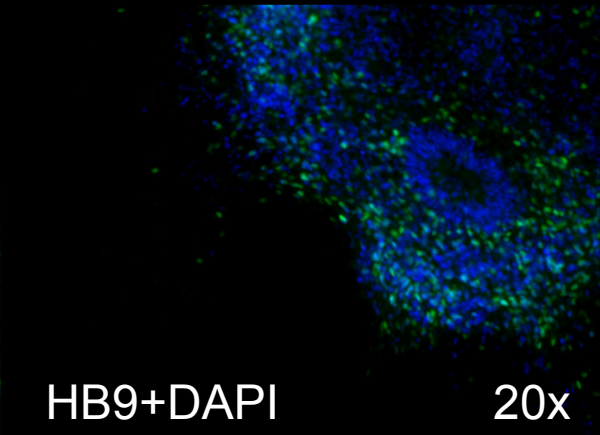

**All are Control2 iPS3-derived**

# Neuron Markers for Controls

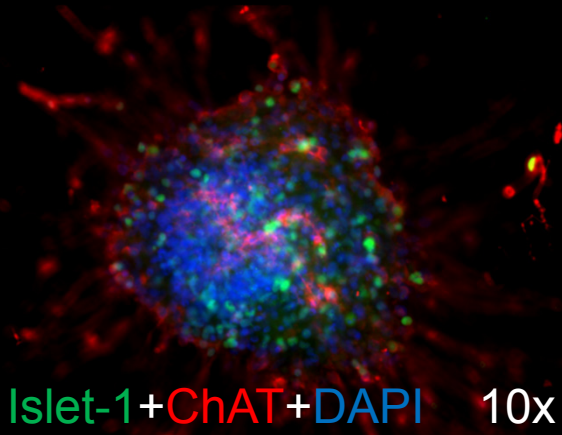

**Control2 iPS1-derived**

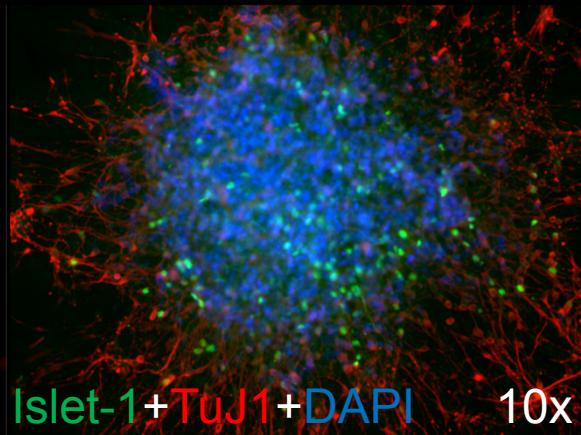

**Control2 iPS3-derived**

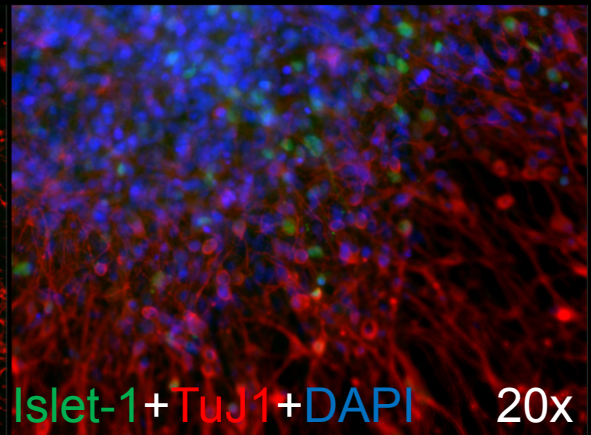

**Control2 iPS3-derived**

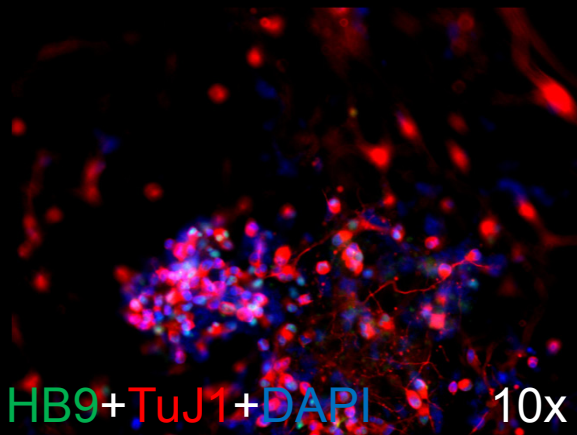

**Control2 iPS3-derived**

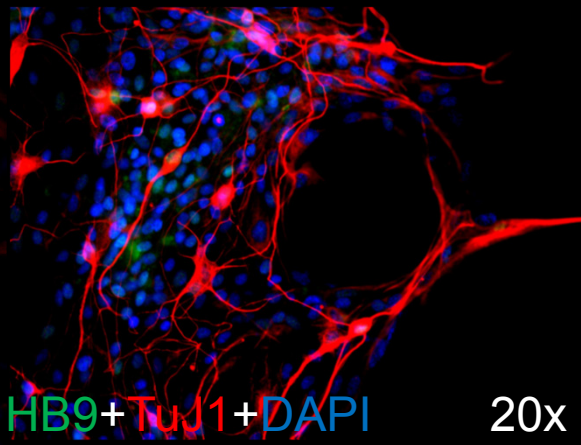

**Control2 iPS3-derived**



# Neural Progenitor Markers for PBD-ZSD Patients

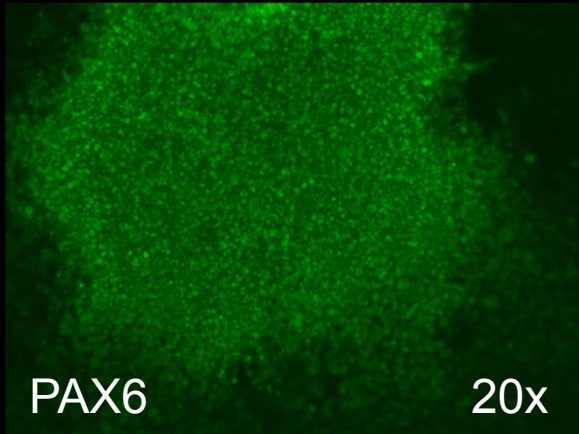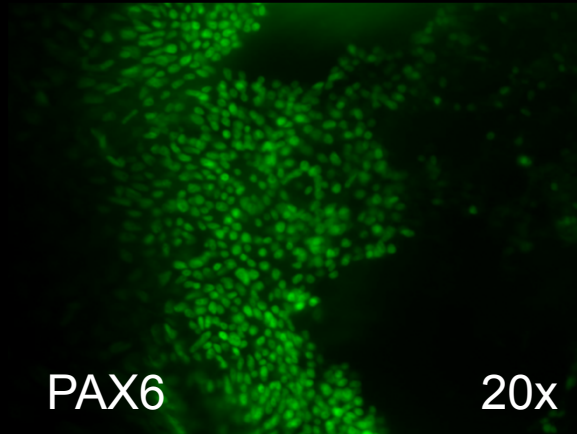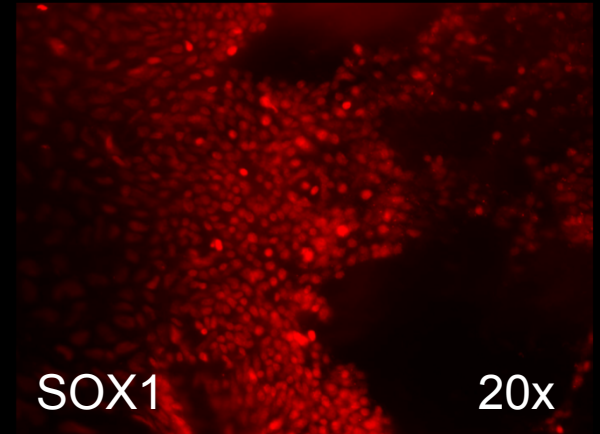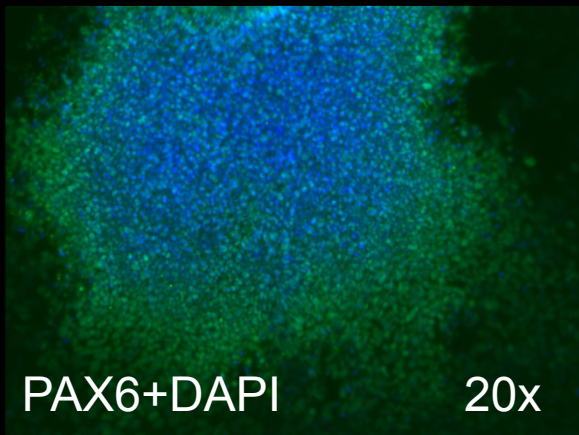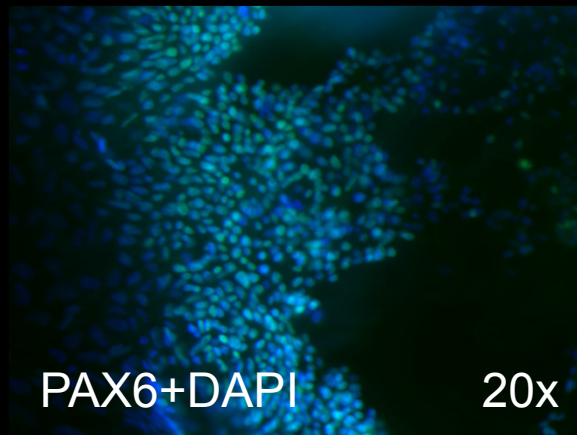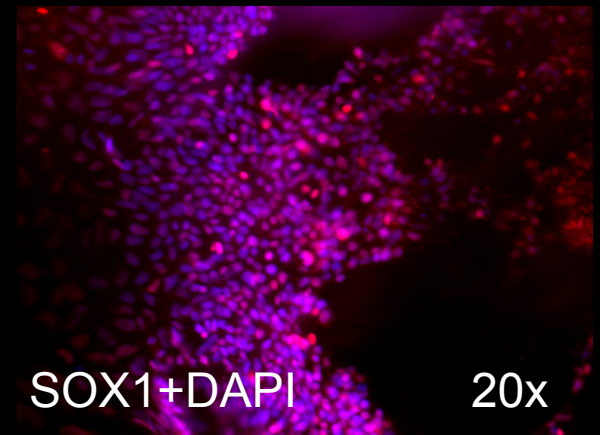

**All PBD\_PEX1ms1 iPS3-derived**



# Motor Neuron Progenitor Markers for PBD Patients

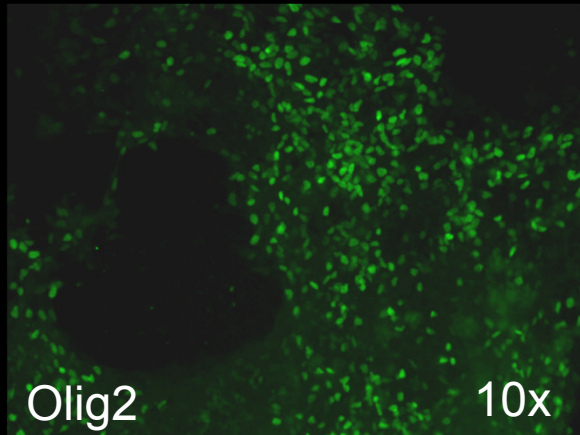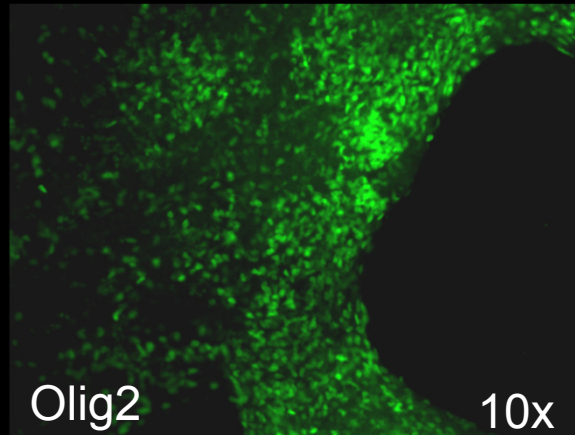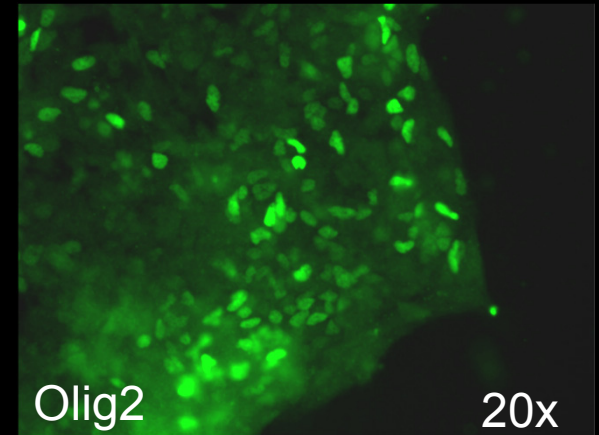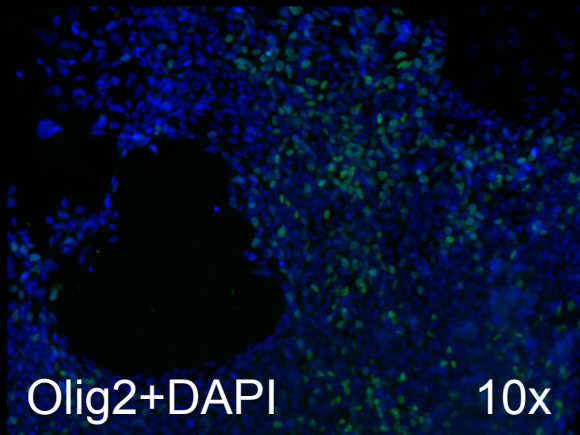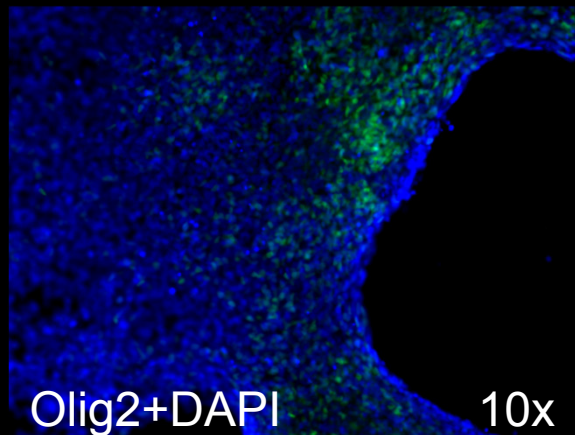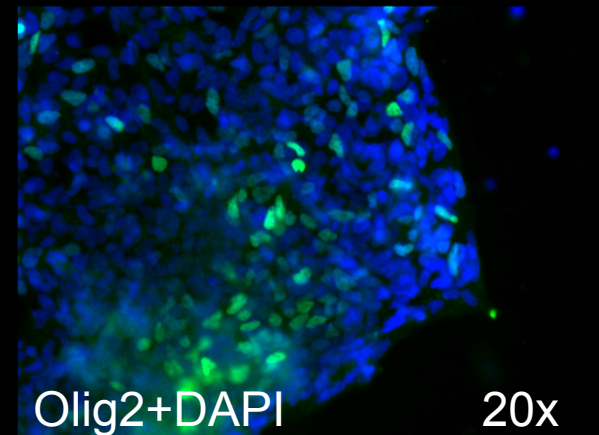

All PBD\_PEX12 iPS2-derived

# Motor Neuron Progenitor Markers for PBD Patients

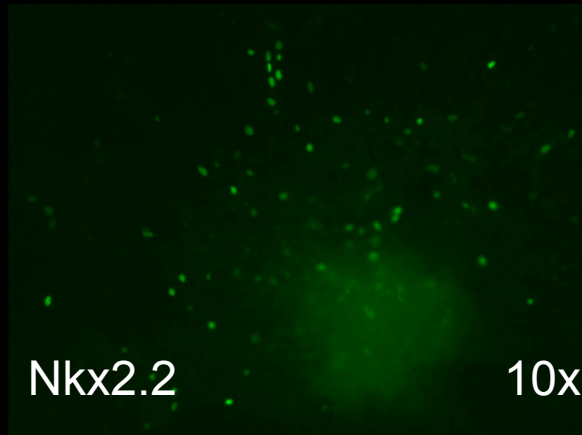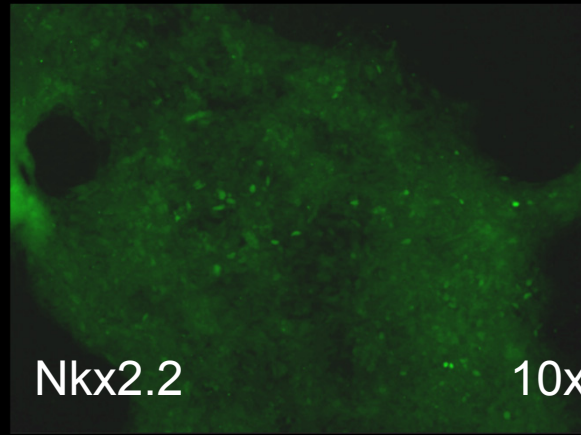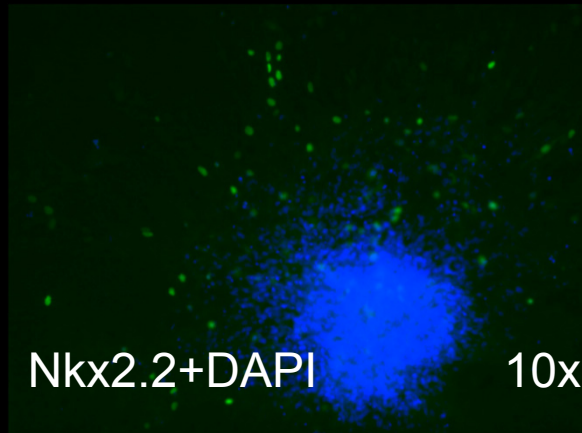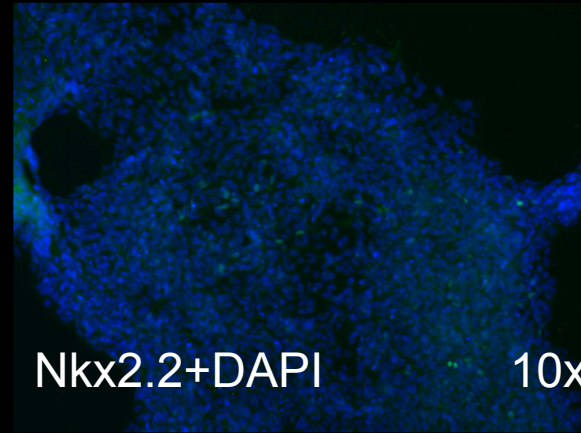

PBD\_PEX1ms1  
iPS1-derived

PBD\_PEX12  
iPS2-derived

# Motor Neuron Progenitor Markers for PBD Patients

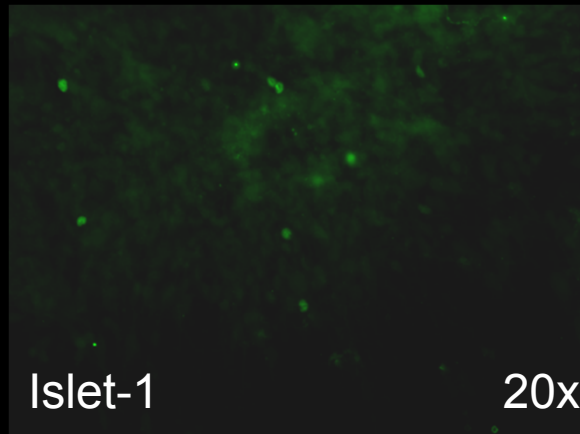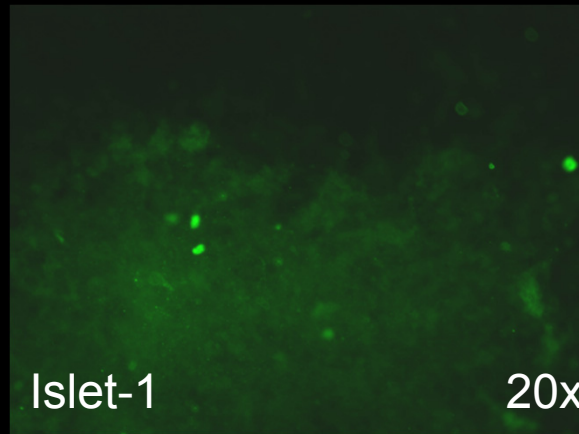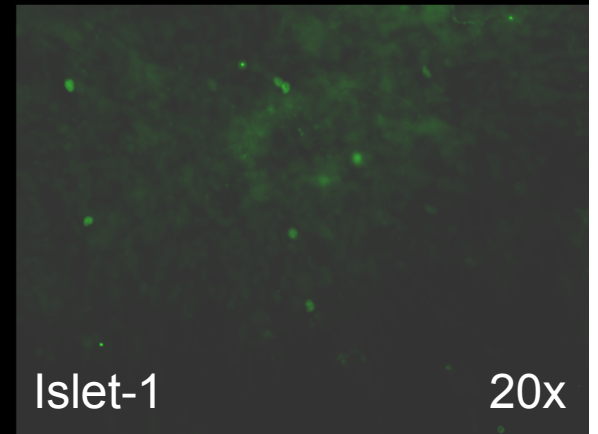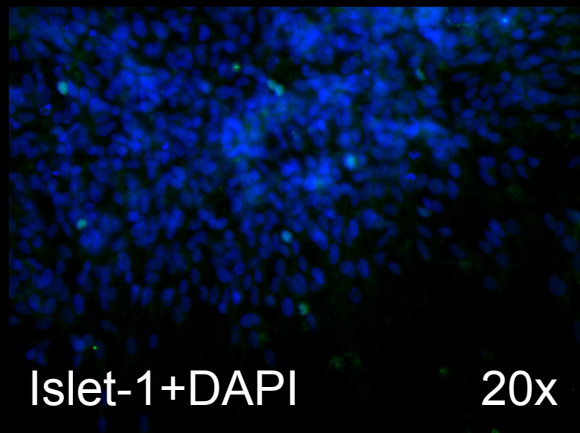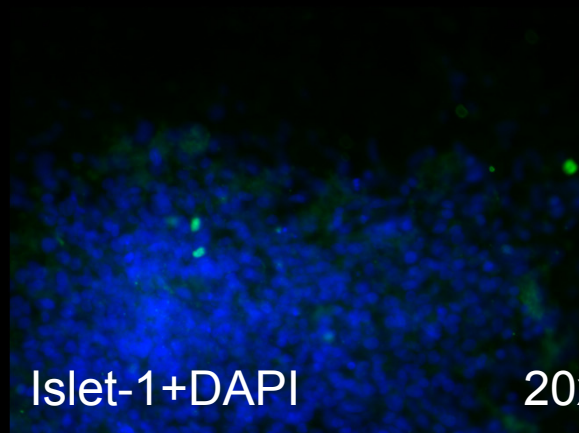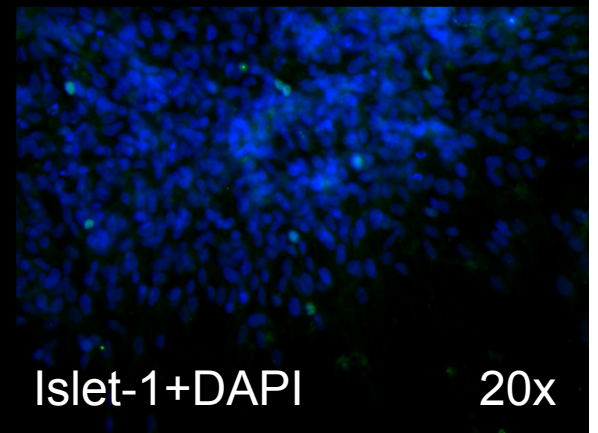

PBD\_PEX1fs2  
iPS2-derived

PBD\_PEX1ms1  
iPS2-derived

PBD\_PEX1fs2  
iPS2-derived



# Neuron Markers for PBD patients

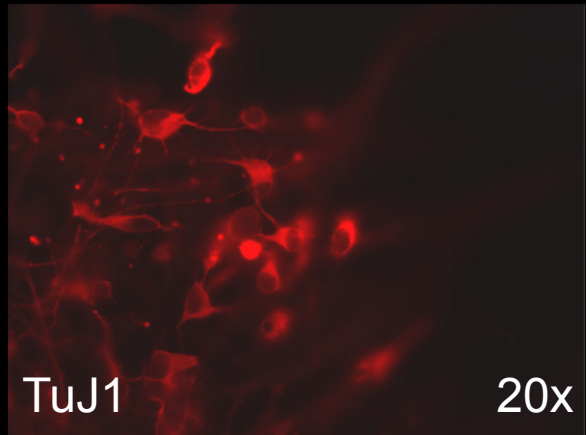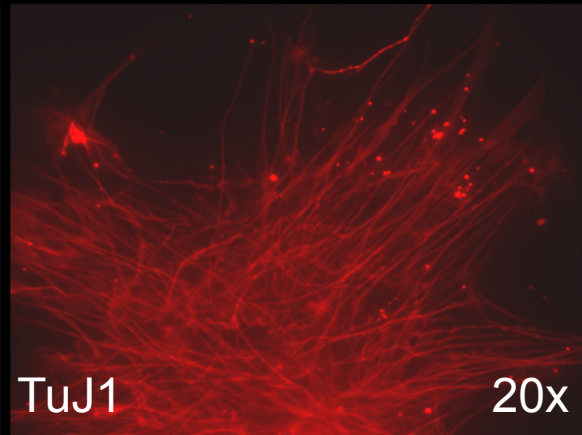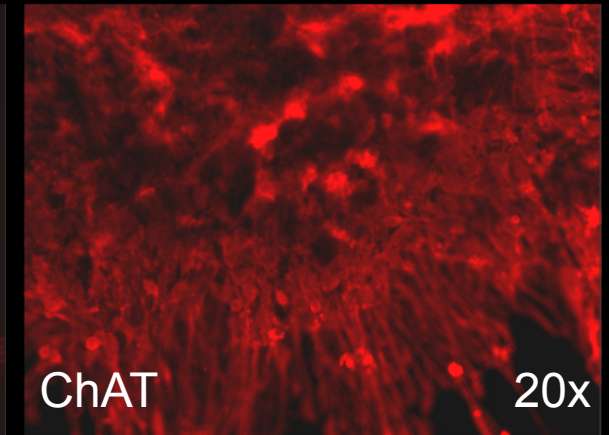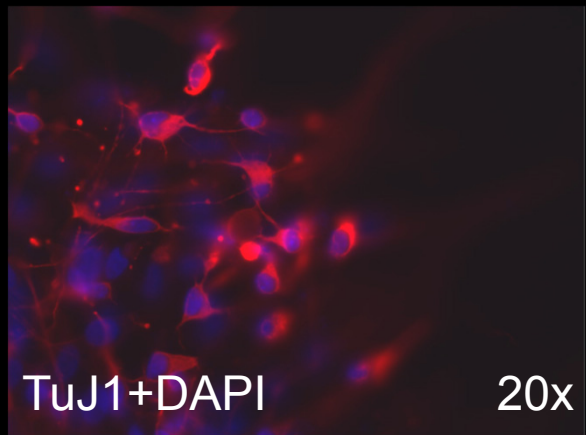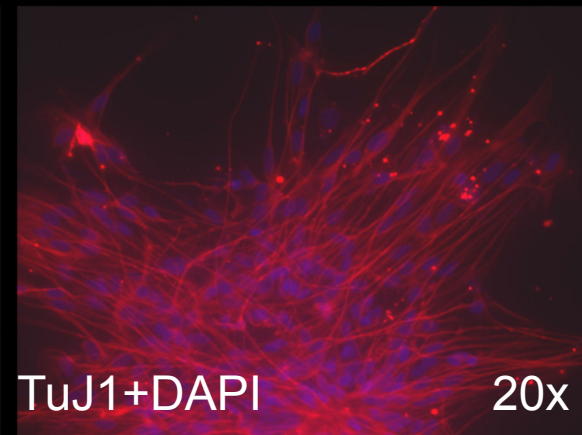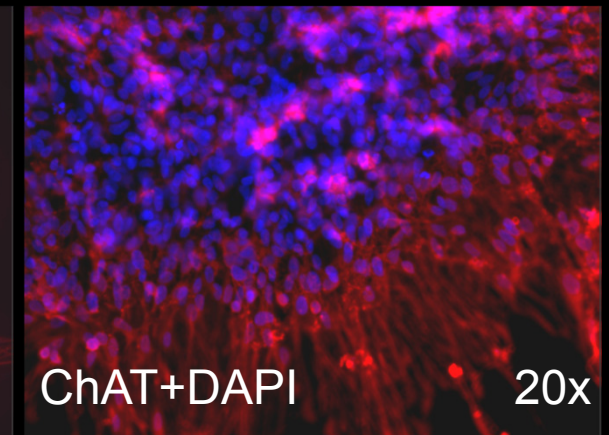

PBD\_PEX1fs1  
iPS2-derived

PBD\_PEX1fs2  
iPS2-derived

PBD\_PEX1fs2  
iPSC2-derived

# Neuron Markers for PBD Patients

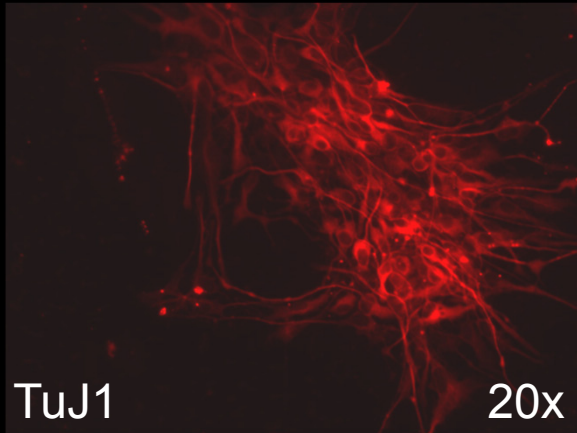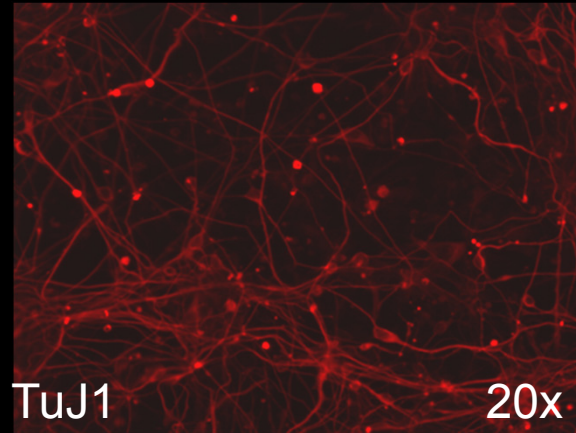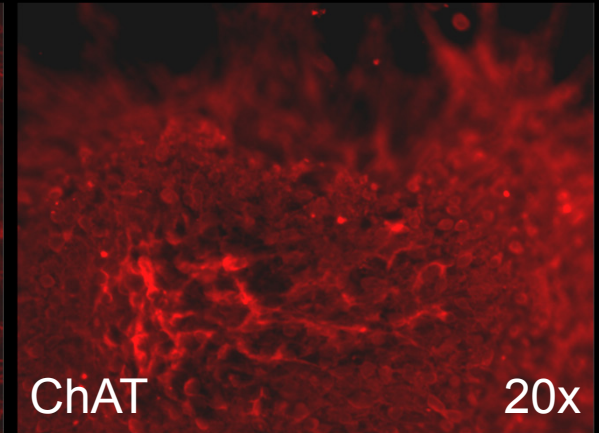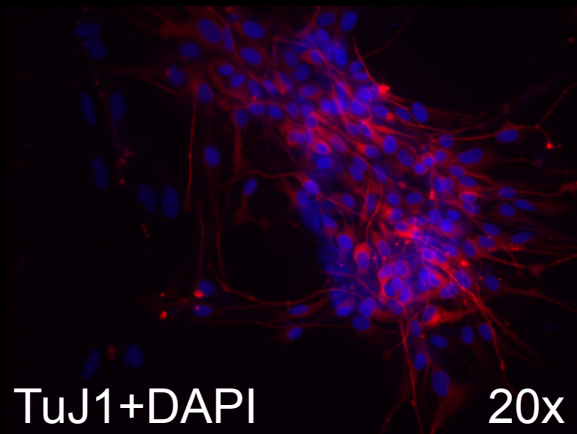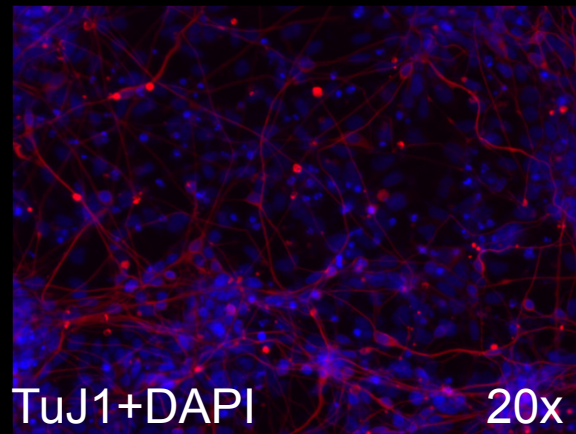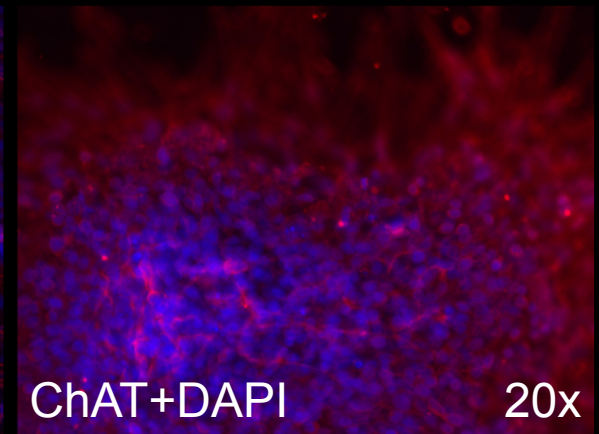

PBD\_PEX1ms1  
iPS2-derived

PBD\_PEX1ms1  
iPS1-derived

PBD\_PEX1ms1  
iPS2-derived

# Neuron Markers for PBD Patients

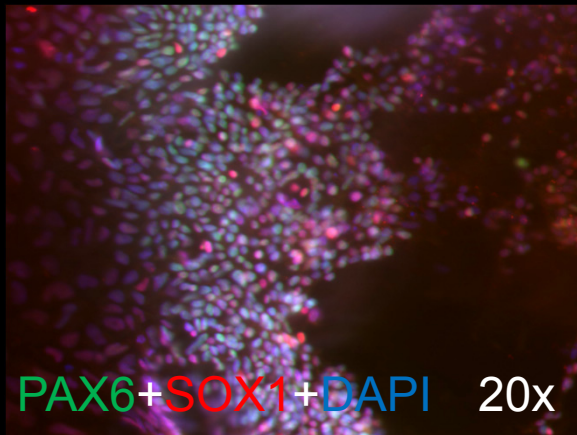

PBD\_PEX1ms1  
iPS3-derived

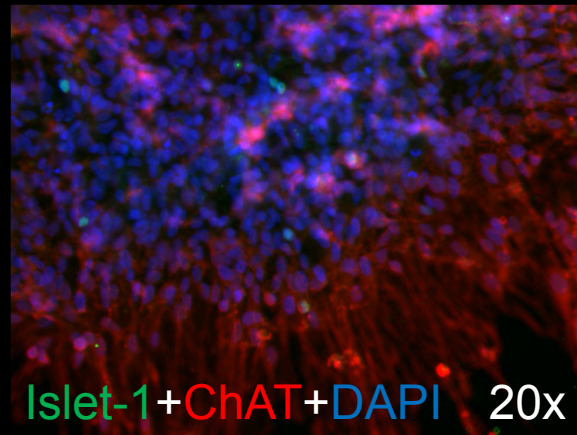

PBD\_PEX1fs2  
iPS1-derived

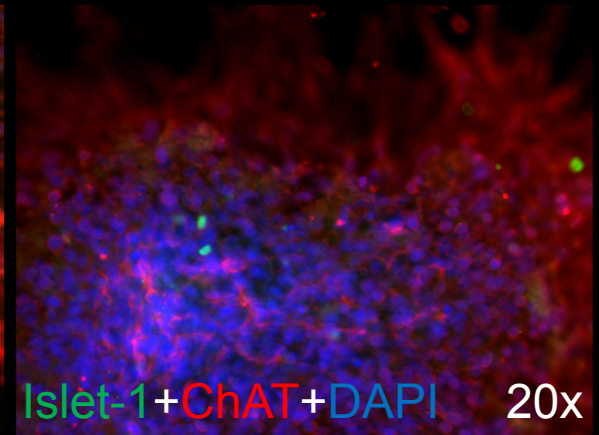

PBD\_PEX1ms1  
iPS2-derived



# Neuroepithelial markers for PBD patients

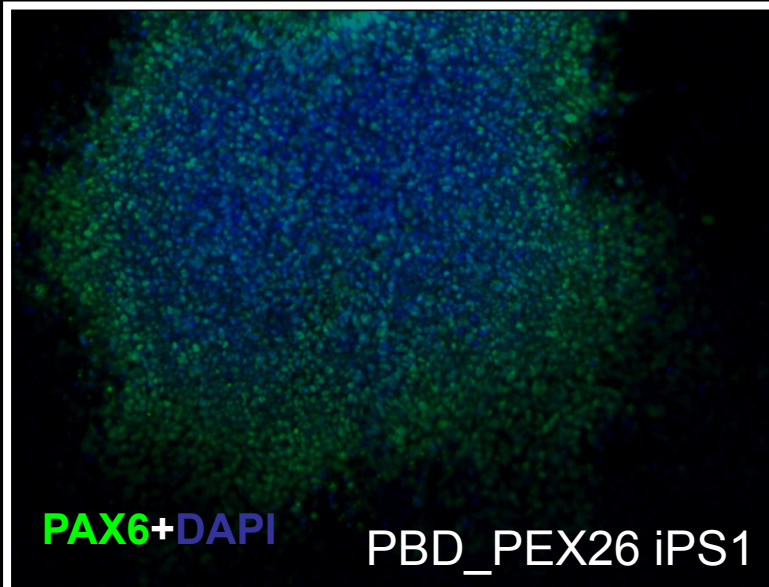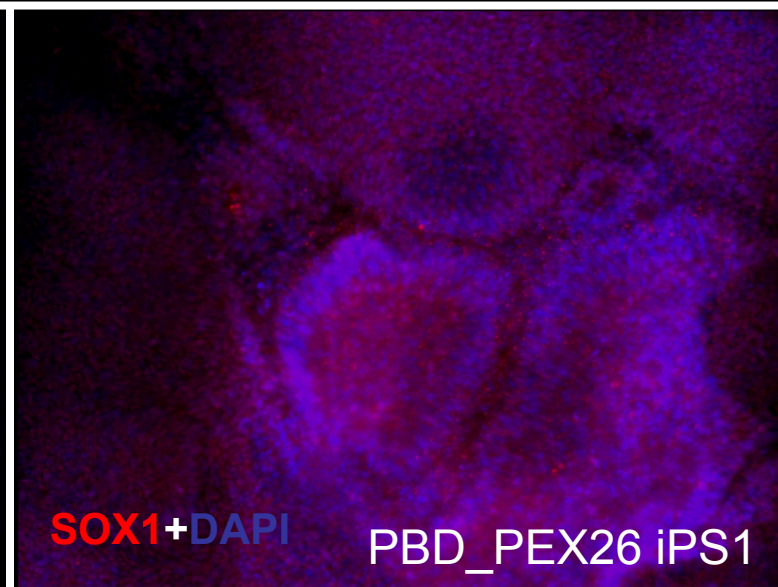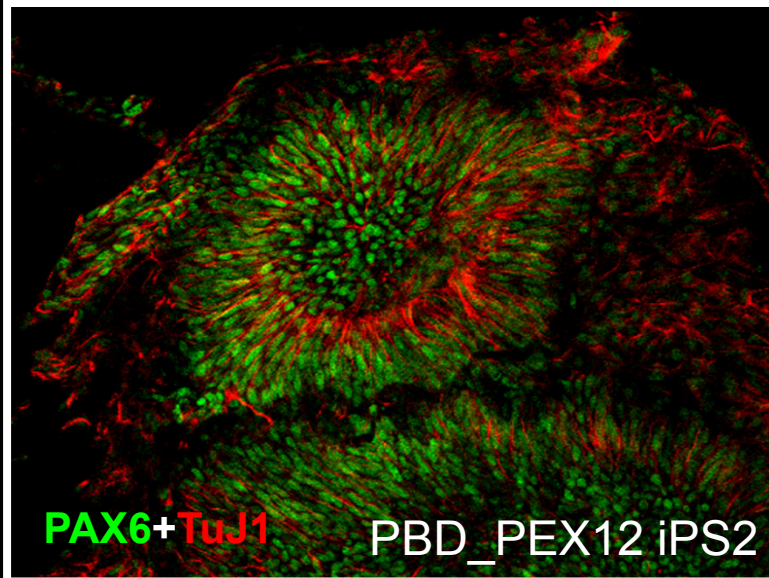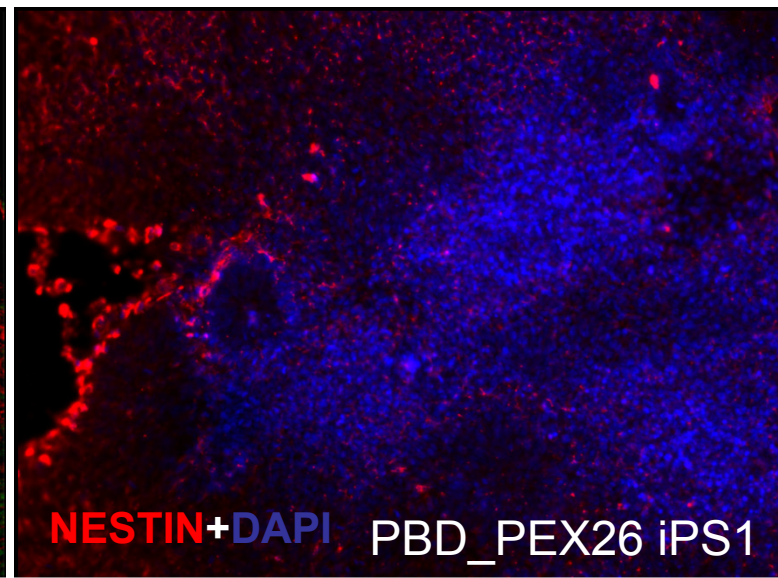

# Motor neuron progenitor markers for PBD patients

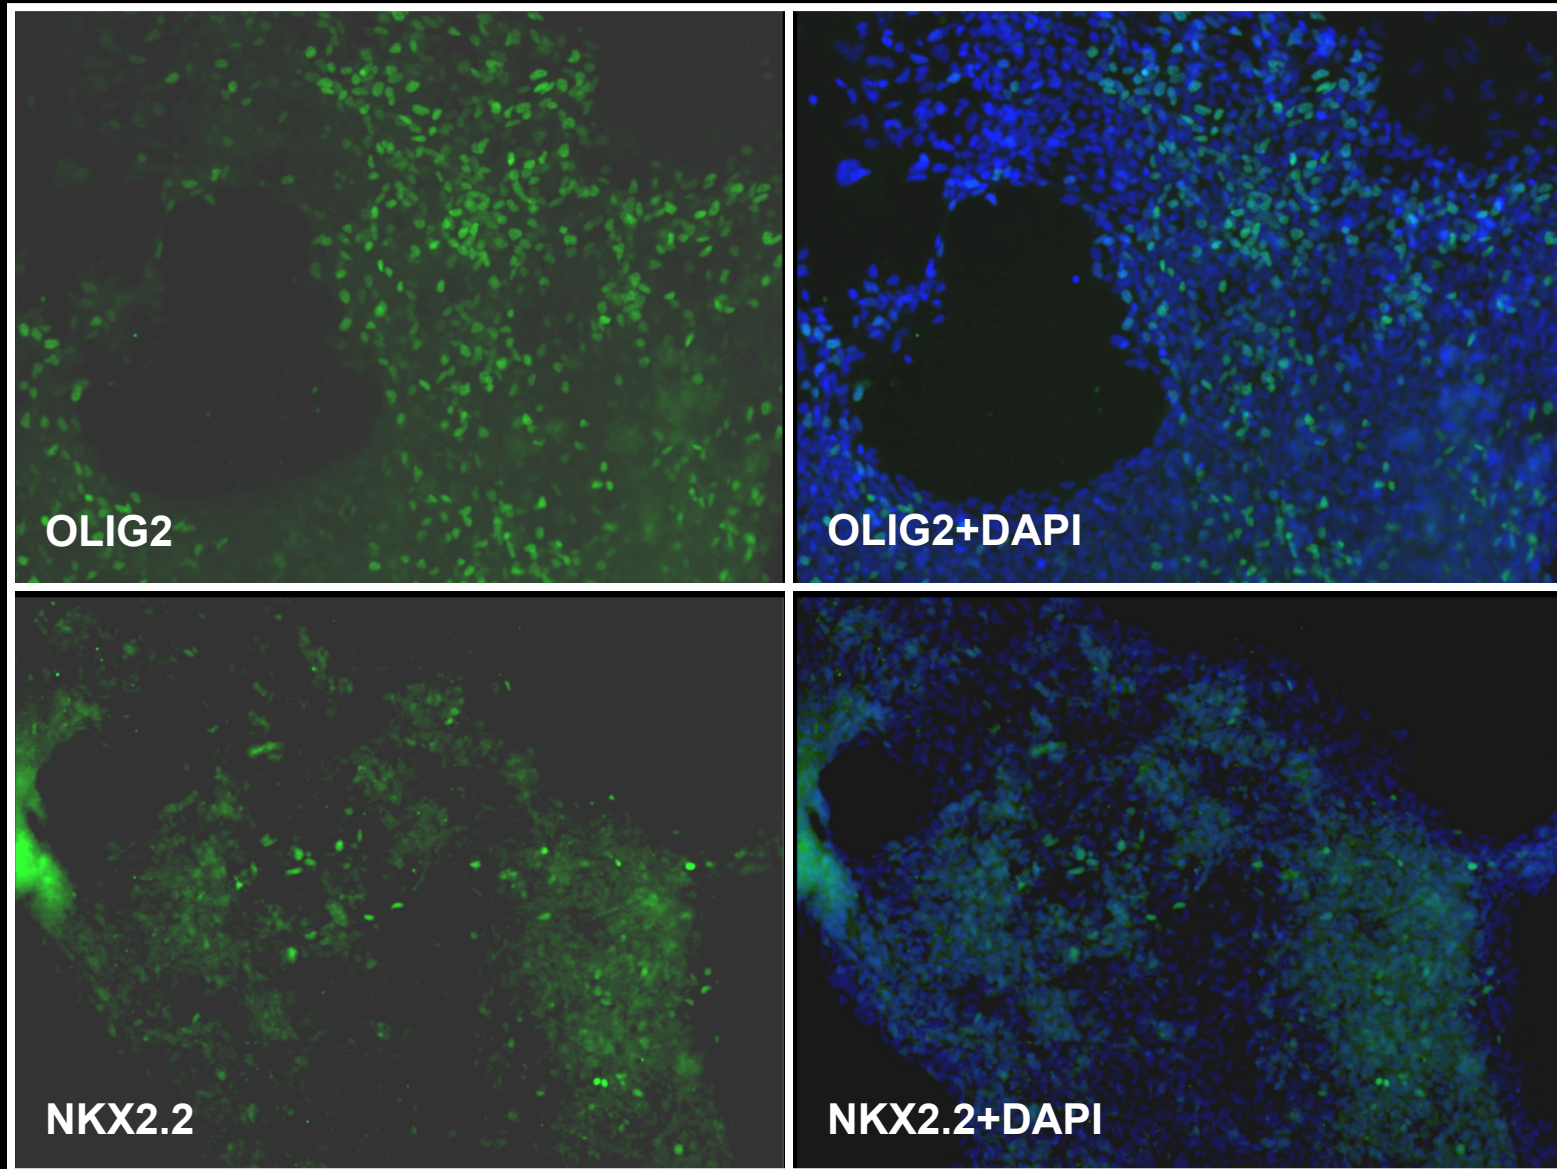

All PBD\_PEX12 iPS2-derived



# Motor neuron markers for Controls

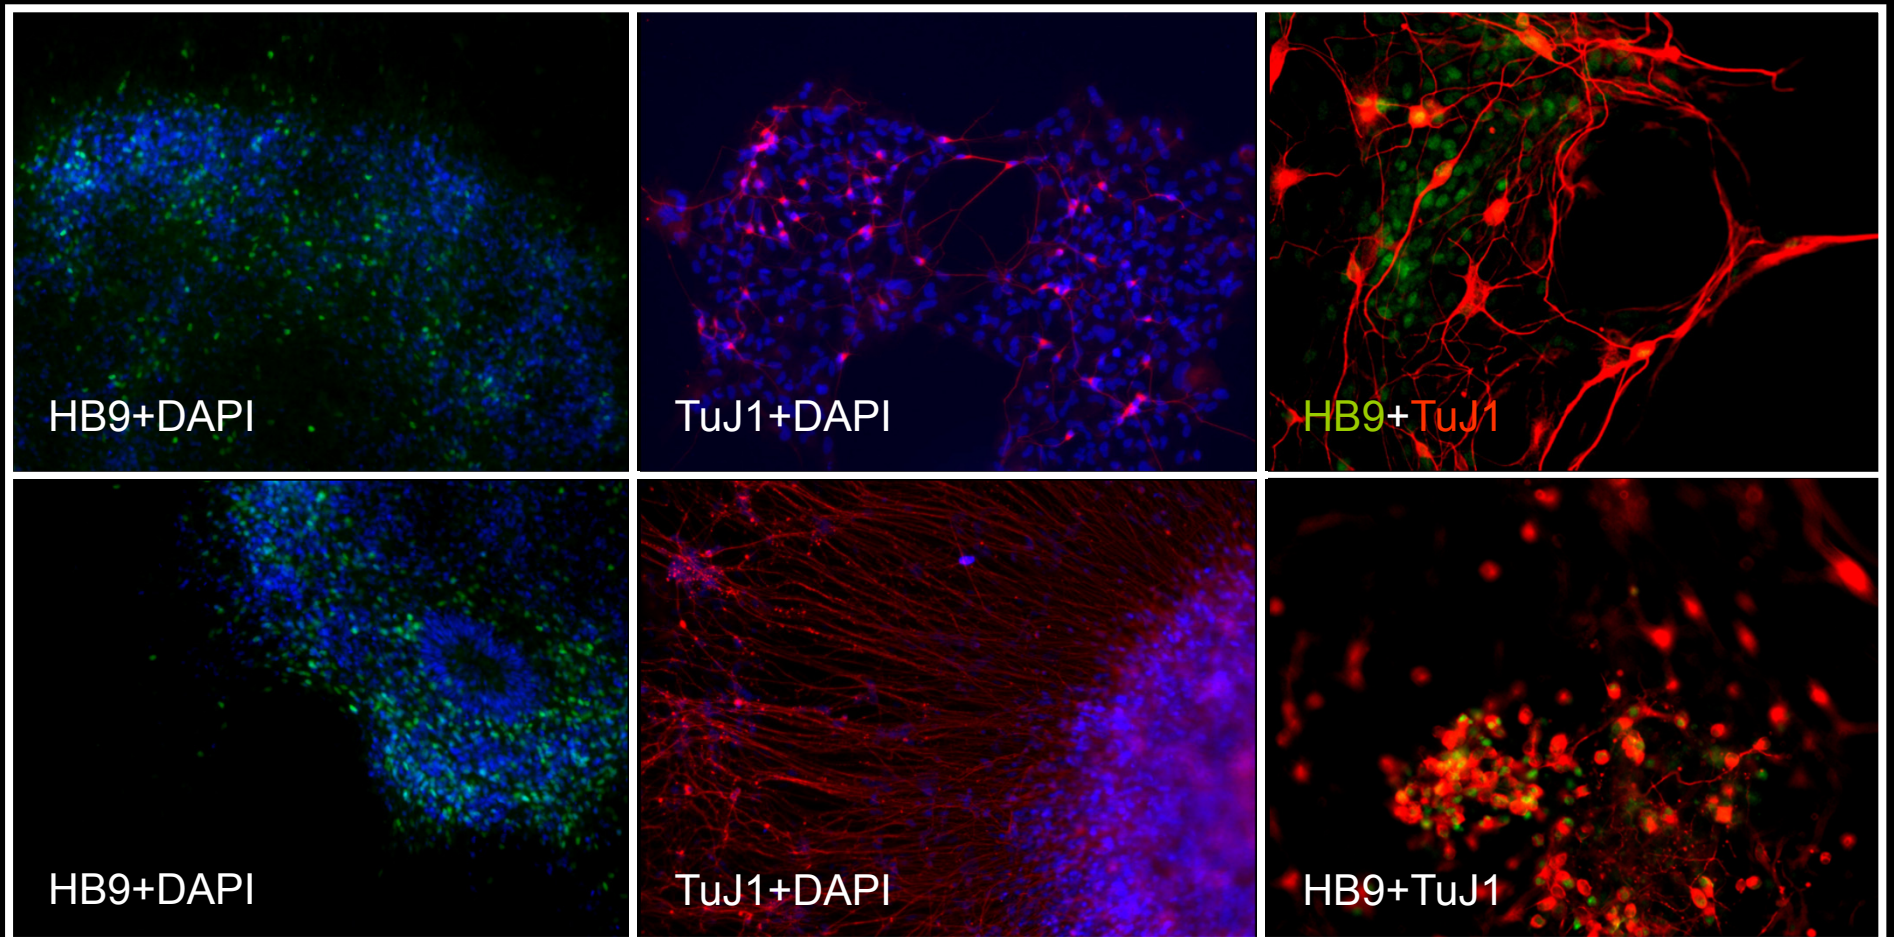

All Control2 iPS3-derived



# Motor neurons transfected with HB9 driven GFP

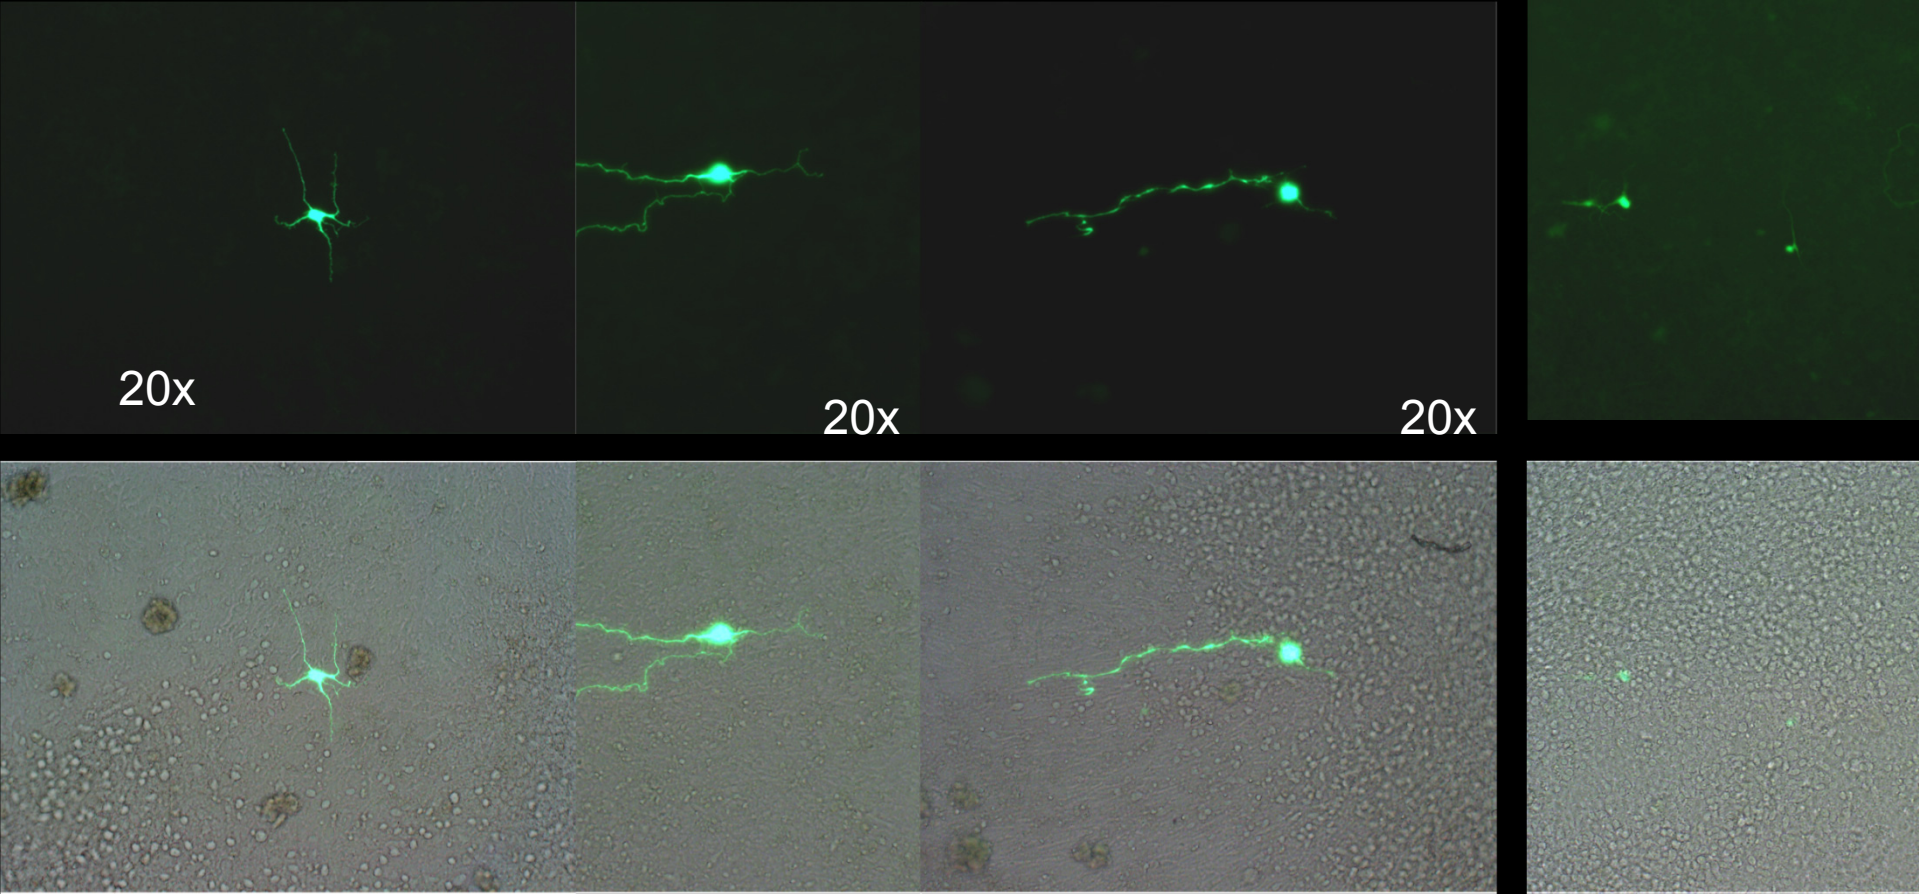

Control2 iPS3-derived

# Motor neurons transfected with HB9 driven GFP

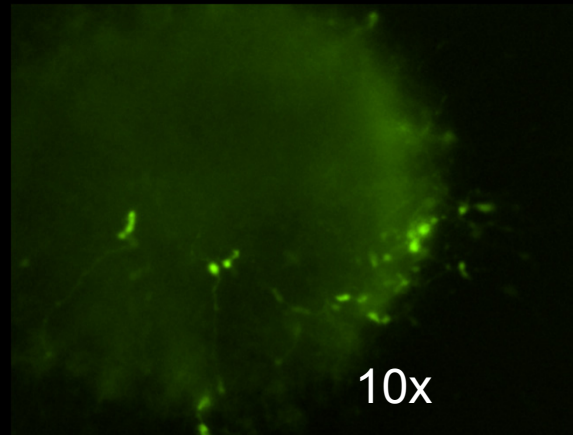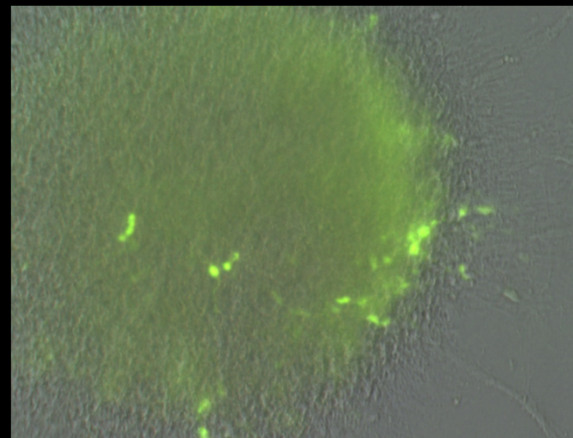

PBD\_PEX1ms1 iPS1-derived

# Motor neurons transfected with HB9 driven GFP

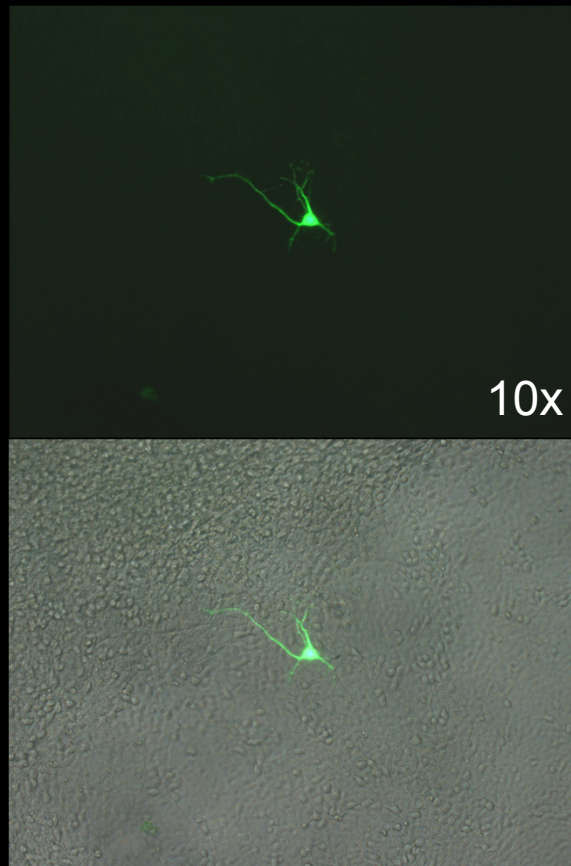

PBD\_PEX1ms1 iPS2-derived



# Motor neurons transfected with HB9 driven GFP

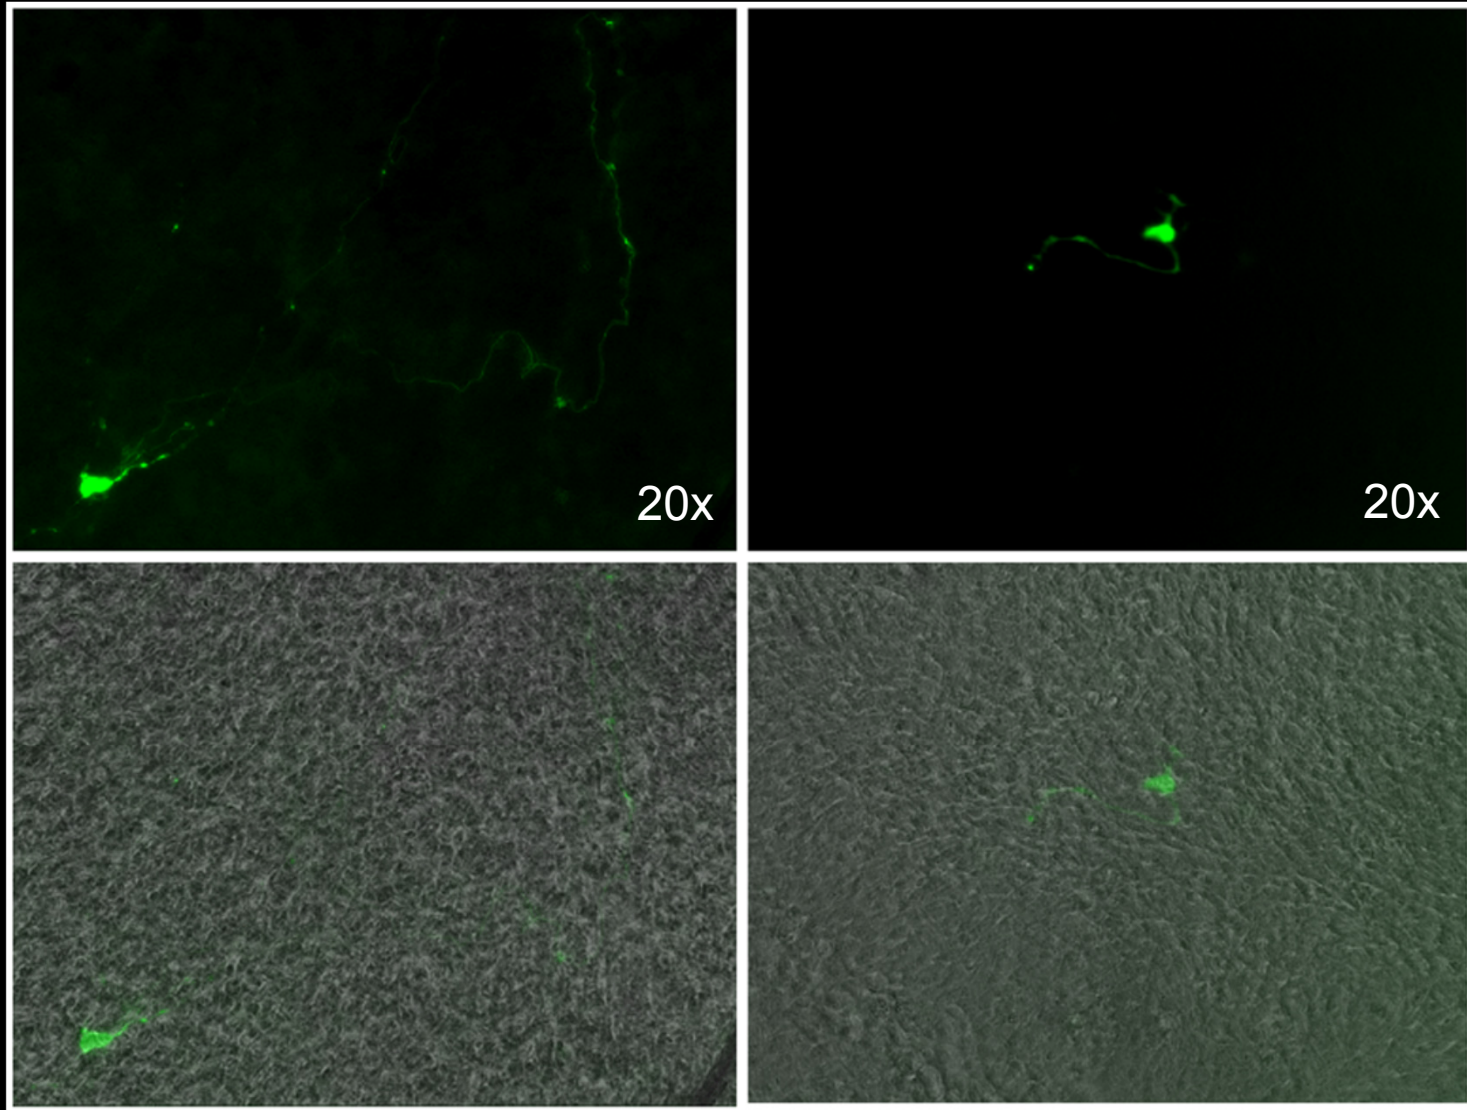

PBD\_PEX1 ms1 iPS5-derived
